1                    **CRISPR perturbations at many coronary artery disease loci**  
2                    **impair vascular endothelial cell functions**

3

4    Florian Wünnemann<sup>1</sup>, Thierry Fotsing Tadjou<sup>1</sup>, Melissa Beaudoin<sup>1</sup>, Simon Lalonde<sup>1</sup>,  
5    Ken Sin Lo<sup>1</sup>, Guillaume Lettre<sup>1,2</sup>

6

7    <sup>1</sup> Montreal Heart Institute, Montréal, Québec, Canada

8    <sup>2</sup> Faculté de Médecine, Université de Montréal, Montréal, Québec, Canada

9

10   **Correspondence:**

11   Guillaume Lettre

12   Montreal Heart Institute

13   5000 Belanger Street

14   Montreal, Quebec, Canada

15   H1T 1C8

16   [guillaume.lettre@umontreal.ca](mailto:guillaume.lettre@umontreal.ca)

17   514-376-3330 ext. 2657

18

19 **ABSTRACT**

20 Genome-wide association studies have identified 161 genetic variants associated with  
21 coronary artery disease (CAD), but the causal genes and biological pathways remain  
22 unknown at most loci. Here, we used CRISPR knockout, inhibition and activation to  
23 target 1998 variants at 83 CAD loci to assess their effect on six vascular endothelial  
24 cell phenotypes (E-selectin, ICAM1, VCAM1, nitric oxide, reactive oxygen species,  
25 calcium signalling). We identified 42 significant variants located within 26 CAD loci.  
26 Detailed characterization of the RNA helicase *DHX38* and CRISPR activation at the  
27 *FURIN/FES*, *CCDC92/ZNF664* and *CNNM2* loci revealed a strong effect on vascular  
28 endothelial cell senescence.

## 29 INTRODUCTION

30 Coronary artery disease (CAD) remains the main cause of mortality in the world  
31 despite widely available drugs (e.g. statins) and the known benefits of simple  
32 prevention strategies (e.g. exercise). Part of the complexity to prevent and treat CAD  
33 resides in our incomplete understanding of atherosclerosis, the pathophysiological  
34 process largely responsible for CAD initiation and progression. Atherosclerosis is  
35 triggered by many environmental risk factors and other intrinsic stimuli, and results in  
36 the dysregulation of vascular wall homeostasis due to the accumulation of cholesterol-  
37 rich lipoproteins and a maladaptive inflammatory state<sup>1,2</sup>.

38

39 Human genetics provide a framework to dissect the biological pathways and cellular  
40 networks implicated in atherosclerosis. Genome-wide association studies (GWAS)  
41 have already identified 161 loci associated with CAD<sup>3,4</sup>. However, the functional  
42 characterization of genes that modulate CAD risk at GWAS loci is labor-intensive. It is  
43 further complicated by the fact that most CAD variants are non-coding and are in  
44 linkage disequilibrium (LD) with a multitude of other DNA sequence variants.

45

46 Half of the CAD GWAS loci do not associate with traditional risk factors. We and others  
47 have hypothesized that some of the CAD variants, which are enriched in open  
48 chromatin regions found in human vascular endothelial cells, directly modulate  
49 endothelial cell functions<sup>5-9</sup>. The functional characterization of two CAD genes in  
50 endothelial cells, *PLPP3*<sup>10</sup> and *MIA3/AIDA*<sup>9</sup>, has further supported this hypothesis.  
51 Vascular endothelial cells have critical roles in atherosclerosis<sup>9,11,12</sup>. Upon activation,  
52 they express adhesion molecules necessary for monocyte rolling and attachment (e.g.  
53 E-selectin, ICAM1, VCAM1) and weakening of their cell-cell junctions can facilitate

54 monocyte transmigration into the intima. Furthermore, dysfunctional endothelial cells  
55 adopt an atheroprone behaviour with changes in calcium ( $\text{Ca}^{2+}$ ) signalling<sup>13</sup>,  
56 decreased bioavailability of the vasodilator nitric oxide (NO) and increased production  
57 of reactive oxygen species (ROS).

58

59 The development of pooled CRISPR-based screens now allows perturbation  
60 experiments to test most sentinel and LD proxy variants associated with CAD for a  
61 role in human vascular endothelial cells<sup>14</sup>. Moreover, by using inhibition (KRAB) or  
62 activation (VP64) domains tethered to an inactivated Cas9 (dCas9), it is possible to  
63 mimic loss- or gain-of-function effects that might elude perturbations due to classic  
64 Cas9 insertion-deletions (indels)<sup>15–17</sup>. Here, we carried out comprehensive pooled  
65 CRISPR screens for six endothelial phenotypes relevant to atherosclerosis  
66 (presentation of adhesion proteins at the cell membrane (E-selectin, ICAM1 and  
67 VCAM1), production of NO and ROS, and intracellular  $\text{Ca}^{2+}$  concentration) using three  
68 different Cas9 perturbation modalities (double-strand break induction (Cas9),  
69 inhibition (dCas9-KRAB or CRISPRi) and activation (dCas9-VP64 or CRISPRa)). Our  
70 results identified 42 variants that modulate endothelial functions, including a subset  
71 that cause endothelial dysfunction by inducing vascular endothelial cell senescence.

72

## 73 RESULTS

### 74 FACS-based pooled CRISPR screens for endothelial functions

75 The design of our sgRNA library is summarized in **Figure 1A**. To target genomic  
76 regions associated with CAD, we collected 92 GWAS sentinel variants at 89 CAD-  
77 associated loci<sup>5,6,18,19</sup> and retrieved their proxy variants in strong LD ( $r^2 > 0.8$  in  
78 populations of European ancestry). Using this strategy, we derived a set of 2,893  
79 variants (92 GWAS sentinel and 2,801 LD proxy variants) (**Figure 1A** and  
80 **Supplementary Table 1**). For each of these variants, we designed a maximum of five  
81 high-quality sgRNAs (**Figure 1B**). The mean distance between sgRNA potential cut-  
82 sites and the targeted variants was 22-bp (**Figure 1C**). After quality-control steps, we  
83 generated a list of 7,393 sgRNA that targeted 1,998 variants at 83 CAD loci  
84 (**Supplementary Table 2**). On average at each CAD locus, our sgRNA library covered  
85  $76 \pm 22\%$  of the targeted variants (**Figure 1D** and **Supplementary Table 3**). Of the 83  
86 tested loci, we could capture 100% of the targeted variants at 20 CAD loci and  $\geq 80\%$   
87 of variants at 38 loci (**Supplementary Table 3**). The majority of the targeted variants  
88 were intronic (70.8%) or intergenic (10.2%) (**Figure 1E**)<sup>20,21</sup>.

89

90 We utilized lentiviruses to deliver our pooled CRISPR libraries to immortalized human  
91 aortic endothelial cells (teloHAEC) that stably express one of three Cas9 variants  
92 (Cas9, CRISPRi, CRISPRa) (**Figure 1F**). We treated Cas9 and CRISPRi (but not  
93 CRISPRa) infected cells with TNF $\alpha$  in order to find genes that can block (Cas9,  
94 CRISPRi) or induce (CRISPRa) a pro-inflammatory response. Then, we labelled cells  
95 with fluorescent antibodies against E-selectin, VCAM1, or ICAM1, or with fluorescent  
96 dyes for signalling molecules (ROS, NO, Ca<sup>2+</sup>), and sorted cell populations by flow  
97 cytometry (FACS) to collect the bottom and top 10% cells based on fluorescence

98 intensity (**Figure 1F** and **Supplementary Figures 1-3**). We amplified and sequenced  
99 the sgRNAs from the FACS cell fractions to identify sgRNAs that have a significant  
100 effect on endothelial functions. Quality-control analyses of sorted cell fractions showed  
101 a good representation of sgRNA diversity (mean Gini index=0.076±0.01) and a good  
102 read coverage per sgRNA (mean number of aligned reads per sgRNA=1995±2981)  
103 (**Supplementary Figure 4**). Analysis of the 10% most variable sgRNAs across all  
104 assays revealed clustering of samples along the Cas9 modalities (**Figure 2A**).

105

### 106 **Effects of CRISPR knockout, inhibition and activation in teloHAEC**

107 To assess Cas9 efficiency in our experiments, we included in the library 330 sgRNAs  
108 against the coding sequence of genes essential for cell viability. For Cas9 and  
109 CRISPRi, we found a strong depletion of sgRNAs targeting essential genes among  
110 the sequenced FACS cell fractions (Kolmogorov-Smirnov (KS) test  $P < 2.2 \times 10^{-16}$  and  
111  $P = 1.6 \times 10^{-13}$ , respectively) (**Figure 2B**). We also noted a minor but significant shift  
112 toward depletion in the sgRNA count distribution of essential genes for the CRISPRa  
113 experiments (KS test  $P = 3.7 \times 10^{-6}$ ), potentially due to steric hindrance effects by the  
114 dead Cas9 moiety near the transcriptional start site of these genes or the toxic impact  
115 of gene over-expression (**Figure 2B**).

116

117 As an additional quality-control step in our experiment, we designed sgRNAs against  
118 the coding and promoter sequences of *SELE*, *ICAM1* and *VCAM1*, which encode the  
119 three adhesion proteins measured in our FACS assays (**Figure 1F**). We observed  
120 significant depletion of sgRNAs targeting coding exons and promoter regions of these  
121 genes in the top vs. bottom 10% FACS fractions with Cas9 or CRISPRi (**Figures 2C-**  
122 **D, Supplementary Figure 5**). In the CRISPRa experiments, the same sgRNAs were

123 enriched in FACS fractions with high E-selectin, ICAM1 or VCAM1 levels (**Figure 2E**,  
124 **Supplementary Figure 5**). The three other endothelial phenotypes measured in our  
125 experiments - NO and ROS production, and Ca<sup>2+</sup> signalling - are physiological  
126 readouts that are not the product of a single gene. In the absence of confirmed positive  
127 control genes that we could target to validate our system, we carefully calibrated the  
128 flow cytometry assays for these readouts using appropriate agonists/inducers  
129 (**Methods**). Our screens are sufficiently sensitive to detect sgRNAs targeting CAD loci  
130 that have strong effects on these hallmarks of endothelial dysfunction.

131

132 Our pooled CRISPR screens identified 51 significant variant-endothelial phenotype  
133 results (false discovery rate (FDR)  $\leq 10\%$ ) involving 42 different variants located within  
134 26 CAD loci (**Figure 3A** and **Supplementary Table 4**). We found significant results  
135 for almost all combinations of Cas9 modality and FACS phenotypes, and most of these  
136 results were specific to a single combination (**Figure 3A**). This highlights the  
137 importance to test several cellular phenotypes and Cas9 modalities to carry out  
138 comprehensive perturbation screens in order to characterize GWAS loci. For 15 CAD  
139 loci where we could target all LD proxies with sgRNAs (**Figure 1D** and  
140 **Supplementary Table 3**), we detected no significant signals in our CRISPR assays,  
141 suggesting that genes within these genomic regions modulate CAD risk through  
142 different functions or cell types. When compared with genomic loci with no significant  
143 results, CAD loci with at least one significant variant in our CRISPR screens were not  
144 better captured by designed sgRNAs (median coverage 73% vs. 78% of LD proxies,  
145 Wilcoxon's test  $P=0.70$ ) but had significantly more LD proxies (median 41 vs. 9  
146 variants, Wilcoxon's test  $P=1.1 \times 10^{-4}$ ).

147

148 Several of the CAD loci identified by GWAS have been implicated in blood lipid  
149 metabolism (e.g. *LDLR*, *APOE*, *PCSK9*). Because genetic variation within these loci  
150 are likely to influence risk through an effect on lipid levels, we did not anticipate  
151 identifying them in our endothelial cell functions CRISPR screens. Of the variants that  
152 mapped to 10 lipid loci included in our screens, all were negative across the different  
153 endothelial phenotypes tested except rs118039278 located in an intron of *LPA*  
154 (CRISPRa for ICAM1, FDR<0.001, **Figure 3A**). Although *LPA* is not expressed in  
155 teloHAEC, CRISPRa could induce its ectopic expression and the encoded Lp(a)  
156 lipoprotein has been shown to induce endothelial dysfunction<sup>22</sup>.

157

### 158 **Validation of a CAD-associated regulatory variant at the *FURIN/FES* locus**

159 To validate our results, we selected eight SNPs at seven CAD loci and performed  
160 individual sgRNA infection and FACS experiments (**Supplementary Table 5**). For this  
161 validation step, we prioritized variants that were significant for >1 cellular phenotype  
162 and that had strong effect sizes in the CRISPR screens. For each experiment, we  
163 compared the distribution of the FACS-based cellular phenotype between control  
164 sgRNAs and the best sgRNA targeting each selected CAD variant (**Figure 3B**). Across  
165 three independent biological replicates, we could validate six of the eight selected  
166 SNPs (one-tailed *t*-test  $P < 0.05$ , **Supplementary Table 5**).

167

168 To investigate the global transcriptional consequences of genome editing  
169 perturbations and elucidate the underlying impact of these loci on endothelial cell  
170 biology, we performed RNA-seq for five sgRNAs that passed primary validation. At the  
171 *FURIN/FES* locus, the top sgRNA (sgRNA\_06939) maps to rs12906125, a variant in  
172 strong LD with the CAD sentinel variant rs2521501 ( $r^2=0.91$ ). rs12906125 is located



173 in the *FES* promoter and overlaps an ATAC-seq peak as well as a H3K27ac-defined  
174 enhancer that physically interacts with the *FURIN* promoter (**Figure 4A**)<sup>9</sup>. The same  
175 SNP is an eQTL for *FES* in human primary aortic endothelial cells<sup>23</sup> and arterial tissues  
176 from GTEx. In the CRISPRa experiments, we found a significant up-regulation of both  
177 *FES* ( $\log_2(\text{fold-change (FC)})=3.75$ , adjusted  $P=8.5 \times 10^{-173}$ ) and *FURIN* ( $\log_2 \text{FC}=0.78$ ,  
178 adjusted  $P=1.5 \times 10^{-10}$ ) (**Figure 4B**).

179

180 Recently, a different CAD SNP at the same locus, rs17514846, was shown to be an  
181 eQTL for *FURIN* in vascular endothelial cells<sup>24</sup>. This variant was not tested in our  
182 CRISPR screens because of weaker LD with the sentinel variant rs2521501 ( $r^2=0.47$ ).  
183 *FURIN*, which encodes a proprotein convertase, represents a strong candidate CAD  
184 causal gene at this locus: its specific knockdown in human endothelial cells reduced  
185 atheroprone characteristics such as monocyte-endothelial adhesion and  
186 transmigration<sup>24</sup>. Consistent with these previous *FURIN*-related results, gene-set  
187 enrichment analysis (GSEA) of the *FURIN/FES* RNA-seq data highlighted genes  
188 implicated in inflammatory responses (interferon,  $\text{TNF}\alpha/\text{TGF}\beta$ ) and cell cycle  
189 regulation (p53, apoptosis) (**Figure 4C** and **Supplementary Table 6**). Although our  
190 results are consistent with *FURIN* representing a strong CAD candidate gene, we  
191 cannot rule out a role for *FES* given the strong CRISPRa effect (**Figure 4B**). *FES*,  
192 which encodes a tyrosine protein kinase that can control cell growth, differentiation  
193 and adhesion, has not been implicated in vascular endothelial cell biology.

194

### 195 **Loss of *DHX38* function induces vascular endothelial cell senescence**

196 Two of the validated sgRNAs target synonymous variants in *DHX38* (rs2074626,  
197 rs2240243) and mediate Cas9 nuclease effects on E-selectin (**Figures 3A-B**) and

198 VCAM1 (as validated by subsequent analyses, **Supplementary Table 5**). We  
199 confirmed the E-selectin result using Cas9 ribonucleoprotein complexes  
200 (**Supplementary Figure 6**). In our screens, we also tested but found no significant  
201 effects for two *DHX38* missense variants (rs1050361, rs1050362). However, in  
202 contrast to the *DHX38* synonymous variants, these missense variants are located in  
203 early exons (exons 2-3, with transcripts potentially escaping nonsense-mediated  
204 mRNA decay) that are expressed at low levels. *DHX38* encodes a RNA helicase  
205 involved in splicing (**Figure 5A**).

206

207 In the RNA-seq experiments with a sgRNA targeting *DHX38* (seven days post-  
208 infection, TNF $\alpha$  treatment), the gene was not down-regulated and we found few reads  
209 with Cas9-mediated indels (<2%), yet a strong gene expression signature suggesting  
210 an effect on cell proliferation with the modulation of genes involved in the p53, G2/M  
211 checkpoint and E2F target genes pathways (**Figure 5B**). Together, these results  
212 suggest a complex scenario: two sgRNAs targeting Cas9 nuclease to *DHX38* exons  
213 produce robust cell adhesion phenotypes as well as a cell cycle-related gene  
214 expression signature without apparently introducing many indels nor impacting *DHX38*  
215 expression levels. To reconcile these observations, we hypothesized that endothelial  
216 cells with *DHX38* detrimental indels have a growth disadvantage and induce a  
217 response in surrounding cells without *DHX38* indels through paracrine signalling. To  
218 test this model, we replaced the antibiotic resistance marker by a fluorescence protein  
219 (CRIMSON) in the sgRNA vector so that we can sort and characterize at different  
220 timepoints teloHAEC stably expressing Cas9 that have or not received a *DHX38*  
221 sgRNA (**Figure 5C**). While the fraction of CRIMSON<sup>+</sup> cells is similar for safe harbor  
222 and *DHX38* sgRNAs two- and four-days post-infection, it is significantly lower after

223 seven days (**Figure 5D**). This observation is aligned with our pooled CRISPR screens  
224 results since cells were also tested for endothelial dysfunction phenotypes seven days  
225 post-infection. Although we did not capture many *DHX38* indels in the RNA-seq  
226 experiment, we could detect a high frequency of indels (15-40%) in CRIMSON<sup>+</sup> cells  
227 already two days post-infection (**Figure 5E** and **Supplementary Table 7**). Importantly,  
228 we also measured a down-regulation of *DHX38* expression levels in CRIMSON<sup>+</sup> cells,  
229 confirming that *DHX38* is likely the gene at this CAD locus that mediates the  
230 endothelial phenotypes (**Figure 5F**).

231

232 Our hypothesis would be consistent with vascular endothelial cell senescence and the  
233 senescence-associated secretory phenotype (SASP)<sup>25,26</sup>. In CRIMSON<sup>+</sup> cells with  
234 *DHX38* sgRNA, we measured an up-regulation of *CDKN1A* (encoding the CDK2  
235 inhibitor p21<sup>WAF1/Cip1</sup>) and detected a higher number of cells with  $\beta$ -galactosidase  
236 activity when compared to CRIMSON<sup>-</sup> cells or CRIMSON<sup>+</sup> cells with a safe harbor  
237 sgRNA (**Figures 5F-G**). These characteristics are hallmarks of cell senescence.  
238 Activation of the senescence program is specific to *DHX38* and not a general response  
239 to DNA damage induced by this particular sgRNA as four different sgRNAs targeting  
240 two different *DHX38* exons impaired endothelial functions in the CRISPR screens.  
241 Collectively, our observations point towards the induction of senescence in teloHAEC  
242 with dysregulated *DHX38* expression and help explain the results from our RNA-seq  
243 experiment. In the cell population profiled by RNA-seq, we found few *DHX38* indels  
244 and did not detect *DHX38* down-regulation because cells with *DHX38* detrimental  
245 indels underwent senescence-mediated growth arrest. However, these *DHX38*-edited  
246 senescent cells secreted pro-inflammatory molecules as part of the SASP which, in

247 combination with the TNF $\alpha$  added to the cell medium, activated a transcriptional  
248 response in teloHAEC without *DHX38* edits.

249

### 250 **A transcriptional signature of senescence triggered by CRISPRa perturbations** 251 **at three CAD loci**

252 To assess the role of vascular endothelial cell senescence in explaining our CRISPR  
253 screens results, we re-analyzed our RNA-seq data using senescence and SASP  
254 curated gene sets<sup>27</sup>. This analysis did not yield significant enrichments for sgRNAs  
255 that target *DHX38* or *MAT2A* (**Figure 6A**). Despite our results that implicate *DHX38* in  
256 senescence (**Figure 5**, CRIMSON experiments without TNF $\alpha$ ), we did not expect to  
257 find a gene expression signature of senescence in the RNA-seq experiment (with  
258 TNF $\alpha$ ) because too few cells had *DHX38* indels (see above). Additionally, the SASP  
259 was masked by the presence of exogenous pro-inflammatory TNF $\alpha$ , which we added  
260 to the cell medium to validate the E-selectin phenotype (**Figure 3B**). For *MAT2A*,  
261 targeting Cas9 to the synonymous variant rs1078004 increased ROS production in  
262 TNF $\alpha$ -treated teloHAEC (**Figure 3C**). *MAT2A* encodes a methionine  
263 adenosyltransferase that is responsible for the biosynthesis of S-adenosylmethionine,  
264 a precursor of the potent antioxidant glutathione<sup>28</sup>. The analysis of the *MAT2A* RNA-  
265 seq experiment (with TNF $\alpha$ ) revealed a profile very similar to *DHX38*: we found few  
266 *MAT2A* indels, the gene was not differentially expressed, and we did not detect a  
267 signature of senescence (**Figure 6A**). Thus, it is possible that *MAT2A* edits decrease  
268 *MAT2A* expression, increased oxidative stress and trigger senescence<sup>25,26</sup>, but that  
269 we would only observe this response by enriching for cells with *MAT2A* sgRNA in  
270 medium without exogenous TNF $\alpha$ , as we did for *DHX38* sgRNA (**Figure 5**).

271

272 Analysis of the RNA-seq data for the three CRISPRa experiments showed a strong  
273 senescence signature (**Figure 6A**). While it has recently been reported that CRISPRa  
274 can lead to non-specific transcriptional effects such as the up-regulation of *IL6*<sup>29</sup>, we  
275 used safe harbor sgRNAs to control for such effects and *IL6* was not differentially  
276 expressed in our experiments. Additional controls suggested specificity of our  
277 CRISPRa results (**Supplementary Figure 7**). Beside the *FURIN/FES* locus described  
278 above, the two other CRISPRa experiments targeted intronic variants in *ZNF664*  
279 (rs12311848) and *CNNM2* (rs78260931). Across these three CAD loci, the CRISPRa  
280 experiments shared 734 differentially expressed genes and highlighted biological  
281 pathways that are relevant to senescence, such as the down-regulation of cell cycle-  
282 related genes (**Supplementary Tables 6 and 8**).

283

284 Targeting CRISPRa at rs12311848 did not increase the expression of *ZNF664* but the  
285 expression of *CCDC92*, a gene located 82 kb upstream ( $\log_2FC=0.74$ , adjusted  
286  $P=9.2 \times 10^{-5}$ , **Figure 6B**). The sentinel CAD variant identified by GWAS at this locus is  
287 rs11057401, a missense variant in *CCDC92*. We targeted four sgRNAs at rs11057401  
288 but did not detect significant effects in the CRISPR screens. This result suggests that  
289 CRISPRa gain-of-function experiments are necessary to detect the impact of *CCDC92*  
290 on endothelial dysfunction and senescence. *CCDC92* has been found to be over-  
291 expressed in senescent cells<sup>30</sup>; accordingly, we detected increased *CCDC92*  
292 expression in the *FURIN/FES* (sgRNA\_06939,  $\log_2FC=0.6$ , adjusted  $P=3.3 \times 10^{-5}$ ) and  
293 *CNNM2* (sgRNA\_25344,  $\log_2FC=1.9$ , adjusted  $P=1.8 \times 10^{-42}$ ) CRISPRa experiments.  
294 *CCDC92* over-expression is specific to these sgRNAs as a CRISPRa experiment with  
295 a “silent” sgRNA targeting the *LPL* locus did not induce its expression  
296 (**Supplementary Figure 7B**). Finally, although we measured a robust transcriptional

297 signature of senescence when targeting CRISPRa at the *CNNM2*-rs78260931 locus  
298 (**Figure 6A**), we found no evidence of differential expression for nearby genes (in *cis*,  
299 the closest differentially expressed gene was *NFKB2* located 568 kb away  
300 ( $\log_2FC=0.33$ , adjusted  $P=0.008$ ). We also manually inspected the sequence reads  
301 that mapped to the *CNNM2* region but did not find un-annotated genes that were  
302 differentially expressed. Thus, based on our results, we cannot prioritize a candidate  
303 causal gene at this CAD locus, but emphasize that the effect is specific to this region  
304 and not a sgRNA-specific artifact because three of the four sgRNAs that we targeted  
305 at rs78260931 gave consistent results in the CRISPRa-ICAM1 screen.

## 306 DISCUSSION

307 As for most complex human diseases, many GWAS loci associated with CAD do not  
308 include obvious candidate causal genes nor implicate known pathophysiological  
309 mechanisms. To elucidate their mechanisms and gain insights into atherosclerosis,  
310 we carried out multiple CRISPR screens to test if CAD variants impact vascular  
311 endothelial functions. By combining six different endothelial cell readouts and three  
312 Cas9 modalities, we identified 42 variants at 26 CAD loci (**Figure 3A**). This list is  
313 depleted of variants that modulate CAD risk through an effect on lipid metabolism and  
314 enriched for loci of unknown functions (**Supplementary Table 3**). We found variants  
315 near *ARHGEF26* and *ADAMTS7*, genes previously implicated in leukocyte  
316 transendothelial migration<sup>5</sup> and endothelial cell angiogenesis<sup>31</sup>, respectively. We also  
317 retrieved rs17163363, an intronic variant in *MIA3* that controls the expression of *AIDA*  
318 in endothelial cells<sup>9</sup>.

319

320 There were also variants and genes that we expected to find but did not recover. For  
321 instance, we did not identify rs17114036, a likely functional variant that controls the  
322 expression of *PLPP3* in endothelial cells, although this negative result may be because  
323 the underlying enhancer requires hemodynamic stress to be active<sup>10</sup>. Furthermore,  
324 our screens did not yield variants at CAD loci that include *PECAM1* (adhesion protein  
325 CD31) and *NOS3* (endothelial NO synthase), two genes with important roles in  
326 endothelial cells. As for *PLPP3*, it might be that we did not activate endothelial cells  
327 with the right stimulus to detect the functional impact of these variants/genes in our  
328 assays. It is also possible that some loci will require the precise engineering of alleles  
329 (e.g. using base editing) to detect a cellular phenotype, or that the phenotypic effect

330 of a variant at the cellular level is too low to distinguish a true signal from the  
331 experimental noise inherent to any large-scale omics approach.

332

333 We designed our sgRNA library using a variant-focused approach. Our rationale was  
334 that the identification of causal variants by CRISPR perturbations would lead us to the  
335 causal genes and biological pathways. This strategy worked at a few CAD loci (e.g.  
336 *MIA3/AIDA*<sup>9</sup>). At the *FURIN/FES* locus, we found a candidate regulatory variant that  
337 was also prioritized using orthogonal methodologies (**Figure 4**)<sup>23</sup>. However, it is also  
338 likely that some of the findings from our CRISPR screens result from loss- or gain-of-  
339 function effects on causal genes independently of the causal variants. For instance,  
340 we identified and validated sgRNAs near synonymous variants in *DHX38* and *MAT2A*  
341 using the Cas9 nuclease. While synonymous variants can have phenotypic  
342 consequences, it is more likely that these variants are in LD with the causal variants  
343 but were captured in our screens because they targeted loss-of-function indels to the  
344 *DHX38* and *MAT2A* coding sequences. Similarly, ectopic activation or inhibition of  
345 gene expression by CRISPRa and CRISPRi can highlight potential nearby causal  
346 genes (e.g. *CCDC92*) even if the sgRNAs do not directly overlap causal variants.

347

348 Vascular endothelial cell senescence emerged as an important response in our  
349 CRISPR perturbation screens. Senescent endothelial cells are characterized by  
350 growth arrest, but also a pro-inflammatory and atheroprone phenotype that involves  
351 increased production of adhesion molecules and ROS, and reduced NO  
352 bioavailability<sup>32</sup>. For *DHX38* with Cas9, we had to design a TNF $\alpha$ -free CRIMSON-  
353 based strategy to confirm senescence (**Figure 5**). Conversely, the RNA-seq results  
354 for the CRISPRa experiments (without TNF $\alpha$ ) at *FURIN/FES*, *CCDC92/ZNF664* and



355 *CNNM2* were less ambiguous, with a clear gene expression signature indicating  
356 senescence (**Figure 6A**). Our controls do not support the hypothesis that this  
357 difference is due to non-specific effects of Cas9 or CRISPRa (**Supplementary Figure**  
358 **7**). Instead, the presence of TNF $\alpha$ , which can induce premature endothelial cell  
359 senescence<sup>33</sup>, has led to a stronger growth arrest phenotype in the presence of Cas9-  
360 mediated indels in *DHX38* (and maybe also *MAT2A*).

361

362 While *FURIN* has been shown to influence endothelial functions<sup>34</sup>, most other genes  
363 (*FES*, *DHX38*, *MAT2A*, and *CCDC92*) have been less studied. Supportive of their role  
364 *in vivo*, we re-analyzed single-cell RNA-seq data from human atherosclerotic right  
365 coronary arteries and confirm that these genes are expressed in human vascular  
366 endothelial cells (**Figure 6C**). Focusing specifically on *CCDC92*, the same CAD  
367 variant is also associated with waist-to-hip ratio, and knockdown of *CCDC92*  
368 expression in immortalized mouse OP9-K stromal cells impaired adipogenesis<sup>35</sup>. This  
369 result prompted the authors to propose a role for *CCDC92* in adipocyte differentiation  
370 and insulin secretion, although the authors did not exclude senescence as a possible  
371 mechanism. In a different study, *CCDC92* over-expression reduced Ebola viral  
372 infections in HEK293 and endothelial HUVEC by blocking the virus without killing the  
373 host cells<sup>36</sup>. It was not investigated, but senescence has been proposed as an antiviral  
374 strategy<sup>37</sup>. Given that *CCDC92* was up-regulated both in *cis* and *trans* in our CRISPRa  
375 experiments, it suggests that it is a key gene located in a CAD GWAS locus that can  
376 impact normal endothelial functions.

377

378 Endothelial cell senescence is both a physiological and pathological process<sup>38</sup>. In  
379 health, it signals the system for vascular endothelium repair. Senescence also

380 increases with age and in response to traditional CAD risk factors. When it overcomes  
381 the regeneration capacity of the system or upon stress, senescence causes  
382 endothelial dysfunction and can lead to vascular diseases. Senescent cells  
383 accumulate at the sites of atherosclerosis in human blood vessels<sup>39,40</sup> and their  
384 selective elimination using transgenic strategies or drugs (senolytics) delays  
385 atherogenesis progression in mice<sup>41</sup>. Our data suggest that a subset of variants  
386 associated with CAD in humans affect key endothelial functions, potentially by  
387 inducing premature senescence. This observation links a large body of literature that  
388 has implicated senescence in atherosclerosis with a genetic program that modulates  
389 endothelial functions. As clinical trials to test the efficacy of senolytics on vascular  
390 diseases are now in discussion<sup>42</sup>, it will be important to explore whether specific CAD  
391 variants or polygenic scores are predictive of their clinical response.  
392

## 393 ONLINE METHODS

### 394 Design of the sgRNA library

395 We retrieved 92 sentinel genetic variants associated with coronary artery disease  
396 (CAD) at genome-wide significant levels ( $P$ -value  $\leq 5 \times 10^{-8}$ ) from four GWAS meta-  
397 analyses available at the time of the design of this experiment<sup>5,6,18,19</sup>. For the design  
398 of the sgRNA library, we included all sentinel variants as well as variants in strong LD  
399 ( $r^2 > 0.8$  in the 1000 Genomes Project European-ancestry populations). For each  
400 variant - sentinel and LD proxy - we identified all possible sgRNA in a 100-bp window  
401 centered on the variant itself. We prioritized sgRNA with the highest predicted quality  
402 using the CRISPR OffTarget Tool (version 2.0.3)<sup>43</sup> with a Targeting\_guide\_score  $\geq$   
403 20 and the “matches with 0 mismatches” = 1 and “matches with 1 mismatch” = 0  
404 settings. We discarded sgRNA that overlapped heterozygous variants, indels and/or  
405 multi-allelic variants in the teloHAEC genome (build hg19). We selected sgRNA  
406 targeting essential genes from a previously published study<sup>44</sup>. For potential positive  
407 control genes (*SELE*, *SELP*, *ICAM1*, *VCAM1*, *PECAM1*, *NOS3*, *VWF*, *SOD2*, *SOD3*,  
408 *GPX3*, *CAT*, *ITPR1*, *ITPR2*, *ITPR3*, *ATP2A2*, *ATP2A3*, *PLN*, *CAV1*, and *TRPV4*), we  
409 selected sgRNA from the Human GeCKOv2 CRISPR knockout pooled library<sup>45</sup>. We  
410 also selected sgRNA that targeted the promoter (300-bp window before the  
411 transcriptional start site) of positive control genes for the CRISPRa (dCas9-VP64)  
412 experiments. For all selected loci (variants, coding sequences, gene promoters), we  
413 retained the five top scoring sgRNA for the library design. Finally, we added two  
414 sgRNA for the *SELE* locus (*SELE\_g1*, *SELE\_g2*) that we frequently use to validate  
415 TNF $\alpha$  stimulation. This resulted in a final library of 8051 sgRNA (**Supplementary**  
416 **Table 2**).

417

418 The sgRNA were synthesized in duplicates by Agilent Technologies (Cat-#: G7555B)  
419 to accommodate the specific requirements of the Cas9/dCas9-KRAB and dCas9-  
420 VP64 (specific MS2 tracrRNA) experiments. We amplified each specific pool of  
421 oligonucleotides as previously described<sup>16</sup>, with the following small modifications: we  
422 performed two PCR using NebNext High fidelity Master mix (Cat-#: M0541L). The first  
423 PCR was used to amplify each pool separately using 2.5ng of pooled oligonucleotides  
424 and 500nM of each primer (for the Cas9/dCas9-KRAB library, we used  
425 U6\_subpool\_fwd and Guide\_CM\_barcode1\_rev; for the dCas9-VP64 library, we used  
426 U6\_subpool\_fwd and Guide\_MS2\_Barcode2\_rev). Cycling conditions for PCR1 were  
427 98°C for 30 sec, then 15 cycles of 98°C for 10 sec; 55°C for 10 sec; 72°C for 15 sec and  
428 a final step of 72°C for 2 min and a 10°C hold. We performed the second PCR to add  
429 homologous sequences, using the U6\_screen\_fwd and Tracr\_rev oligonucleotides for  
430 the Cas9/dCas9-KRAB library, and the U6\_screen\_fwd and Tracr\_MS2\_rev  
431 oligonucleotides for the dCas9-VP64 library, in both cases using  $\frac{1}{5}$  of PCR1 as  
432 template. Cycling conditions for PCR2 were 98°C for 30 sec, then 10 cycles of 98°C for  
433 10 sec; 55°C for 10 sec; 72°C for 15 sec and a final cycle of 72°C for 2 min and 10°C  
434 hold. See table **Supplementary Table 9** for primer details.

435

436 After gel extraction and PCR purification, we performed Gibson assembly in both  
437 respective vectors (pHKO9-Neo and lentisgRNA(MS2)-zeo backbone addgene  
438 61427). For pHKO9-Neo, we replaced the Crimson fluorescent gene in the pHKO9-  
439 Crimson-CM vector (gift from Dan Bauer's lab) by a neomycin resistance (NeoR)  
440 sequence. Briefly, we amplified the NeoR gene from our pCas9-Neo vector<sup>46</sup> using  
441 BsiWI-Neo-Fwd and MluI-Neo\_rev primer (**Supplementary Table 9**). After digestion  
442 by BsiWI and MluI, we cloned the segment in pHKO9-Crimson\_CM, which had been

443 digested with BsiWI and MluI. We amplified each library using ten independent maxi-  
444 preparations (Macherey-Nagel cat# 740424). To control the quality of both libraries,  
445 we sequenced them on an Illumina HiSeq4000 instrument and calculated the Gini  
446 index, which summarizes read distribution across sgRNA in a given pool. For a good-  
447 quality sgRNA library, the expected Gini index is  $\leq 0.2$ , and we obtained Gini indexes  
448 of 0.050 and 0.052 for the Cas9/dCas9-KRAB and dCas9-VP64 library, respectively.

449

### 450 **Engineering of teloHAEC cell lines to stably express Cas9 variants**

451 TeloHAEC are immortalized human aortic endothelial cells obtained by over-  
452 expressing telomerase (ATCC CRL-4052). These cells have a normal female  
453 karyotype (46;XX) and exhibit many of the properties and functions of human vascular  
454 endothelial cells<sup>9</sup>. We generated our teloHAEC cells models expressing either Cas9,  
455 dCas9-KRAB or dCas9-VP64 + MPHv2 using Addgene vectors #52962, #46911,  
456 #61425 and #89308, and lentiviral infection as previously described<sup>46</sup>.

457

### 458 **Pooled CRISPR screen experiments**

459 We produced four batches of lentiviruses for each sgRNA library pool (Cas9/dCas9-  
460 KRAB, dCas9-VP64). We infected each teloHAEC cell line (Cas9, dCas9-KRAB,  
461 dCas9-VP64) at a multiplicity of infection of 0.3 using each batch of viruses separately.  
462 Following viral infection, we selected cells using zeocin (teloHAEC-dCas9-VP64) or  
463 G418 (teloHAEC-Cas9/-dCas9-KRAB) for five (teloHAEC-dCas9-VP64) or seven  
464 days (teloHAEC-Cas9/-dCas9-KRAB) in vascular cell basal medium (ATCC PCS-100-  
465 030) to remove any cells that did not incorporate a vector. After selection, we  
466 stimulated cells expressing Cas9 or dCas9-KRAB using TNF $\alpha$  (10ng/ $\mu$ l) for four hours  
467 to induce a pro-inflammatory response; we did not stimulate cells expressing dCas9-

468 VP64, reasoning that the VP64 transcriptional domain should activate gene  
469 expression. Following TNF $\alpha$  stimulation, we immunostained cells (around 50M cells)  
470 with antibodies linked to phycoerythrin for adhesion molecules (E-selectin (BD  
471 BIOSCIENCES Cat-#: 551145), VCAM-1 (Cat-#: 12-1069-42), ICAM-1 (Cat-#: 12-  
472 0549-42)) or we incubated with fluorescent dye-based reagents for endothelial  
473 signaling markers: (nitric oxide (NO) (DAF-FM Diacetate, Cat-#: D23844)), reactive  
474 oxygen species (ROS) (CM-H2DCFDA, Cat-#: C6827), calcium signaling (Fura Red,  
475 Cat-#: F3021)). We calibrated the FACS assays with positive control treatments to  
476 make sure that we could robustly detect changes in the measured phenotypes.  
477 Antibodies and fluorescent dye-based reagents were titrated to use optimal  
478 concentrations. We also quantified how teloHAEC were responding to ionomycin for  
479 calcium signaling, to sodium nitroprusside for NO and to TNF $\alpha$  for reactive oxygen  
480 species. For adhesion molecules, we utilized sgRNA targeting coding exons and  
481 promoter regions of *SELE*, *ICAM1* and *VCAM1* as positive controls. Unless otherwise  
482 stated, we purchased all antibodies and dyes from ThermoFisher Scientific.  
483 Subsequently, we sorted stained cells by flow cytometry on a BD FACSAria Fusion  
484 flow cytometer to collect the top and bottom 10% of fluorescently labeled cells. FACS  
485 traces were generated with FlowJo (BD Biosciences). We extracted genomic DNA  
486 from both top and bottom 10% cell fractions separately (around 5M cells in each  
487 fraction) using the QIAGEN DNeasy Blood and Tissue kit (Cat No. 69504) according  
488 to manufacturer's instructions.

489

#### 490 **Amplification and sequencing of pooled CRISPR experiments**

491 We amplified sgRNA sequences from genomic DNA via PCR, followed by a cleanup  
492 step using the QIAGEN QIAquick PCR purification kit (Cat-#: 28104) according to the

493 manufacturer's instructions. We used the primer sequences and PCR settings as  
494 previously described in ref. <sup>16</sup>. We created sequencing libraries using Illumina TruSeq  
495 adapters according to the manufacturer's protocols. We sequenced the libraries on an  
496 Illumina Hiseq4000 instrument at the McGill University and Genome Quebec  
497 Innovation Centre (MUGQIC). Generally 6 samples were multiplexed per sequencing  
498 lane for a target read coverage of ~500 reads per sgRNA per sample  
499 **(Supplementary Figure 4B)**.

500

### 501 **Computational analysis of pooled CRISPR screen data**

502 We processed raw sequencing data from the BCL to the FASTQ format using  
503 bcl2fastq at MUGQIC. Raw FASTQ reads were quality-controlled using FastQC  
504 (<https://www.bioinformatics.babraham.ac.uk/projects/fastqc/>) and MultiQC<sup>47</sup>. We  
505 performed downstream analysis of sgRNA sequencing data using MAGECK  
506 (v.0.5.9)<sup>48</sup>. We quantified sgRNA sequences using MAGECK count against the list of  
507 sgRNA sequences in the library (**Supplementary Table 3**), allowing for no  
508 mismatches in the sgRNA sequence. We then tested the difference in sgRNA counts  
509 between cell fractions or conditions using MAGECK maximum likelihood estimation  
510 (*mle*) method with median normalization<sup>49</sup>.

511

### 512 **UMAP representation of sample-level count data**

513 We normalized raw sgRNA counts using variance stabilizing transformation (vst) in  
514 DESeq2<sup>50</sup>. To account for baseline differences between plasmid preparations, we  
515 further normalized samples to their respective vector library by dividing the vst  
516 normalized sgRNA count by the vst normalized count of the Cas9/dCas9-KRAB or  
517 dCas9/VP64 library, respectively. We calculated principal components using the top

518 10% most variable sgRNA (805 sgRNA) across all cell sorted samples based on  
519 normalized counts. Next, we used the loadings from the first three principal  
520 components in Uniform Manifold Approximation and Projection (UMAP)<sup>51</sup> to create a  
521 two-dimensional embedding of the normalized sgRNA count data. Each dot in the  
522 UMAP plot represents one sequenced sample (top or bottom 10% of stained cells).

523

### 524 **Analysis of sgRNAs targeting essential genes**

525 To test for potential effects of sgRNA on endothelial cell death and proliferation, we  
526 compared sgRNA counts of all samples across the same cellular model (Cas9, dCas9-  
527 KRAB, dCas9-VP64) against the respective baseline vector library sgRNA count using  
528 MAGECK *mle*. We used sgRNAs targeting essential genes in the teloHAEC Cas9  
529 cellular model as positive controls.

530

### 531 **Single sgRNA validation**

532 We individually cloned each sgRNA for validation as previously described<sup>52</sup>. We  
533 produced lentiviruses, infected cells, performed antibiotic selection, and stained cells  
534 as for the pooled CRISPR screen. We analyzed cells using flow cytometry (BD  
535 FACSCelesta (BD Biosciences, San Jose, CA, USA) equipped with a 20 mW blue  
536 laser (488 nm), a 40 mW red laser (640 nm), and a 50 mW violet laser (405 nm). For  
537 each experiment, we measured the mean fluorescent intensity (MFI) obtained for  
538 sgRNA of interest and compared it with the MFI for control sgRNA (safe-harbor and/or  
539 scrambled sgRNA). We performed each experiment at least three times. For statistical  
540 analyses, we used Student's *t*-test and determined that a sgRNA had a significant  
541 effect on the measured phenotype when a one-tailed P-value  $\leq 0.05$ .

542



543 For *DHX38* Crimson experiments, we individually cloned each sgRNA in pHKO9-  
544 Crimson-CM vector (gift from Dan's Bauer lab). We produced lentiviruses, infected  
545 cells and performed flow cytometry on a BD FACSAria FUSION flow cytometer at  
546 day 2, day 4 and day 7 post-infection. We analyzed the percentage of Crimson  
547 positive cells and we sorted Crimson positive and negative cells to extract RNA in each  
548 fraction. We extracted total RNA using RNeasy Plus Mini Kit (Qiagen cat #: 74136).  
549 We measured RNA integrity and concentration using Agilent RNA 6000 Nano II assays  
550 (Agilent Technologies) on an Agilent 2100 Bioanalyzer and Take3 on Cytation V (  
551 Biotek). We reverse transcribed 750ng of total RNA using random primers and 1 U of  
552 the MultiScribe Reverse Transcriptase (Applied Biosystems) in a 20  $\mu$ L reaction  
553 volume at 100 mM dNTPS and 20 U of RNase inhibitor with these three steps: 10 min  
554 at 25 °C, 120 min at 37 °C and 5 min at 85 °C. We followed the MIQE guidelines to  
555 assess quality and reproducibility of our qPCR results<sup>53</sup>. We performed qPCR in  
556 triplicates for all samples using: 1.25  $\mu$ L of cDNA (1/50 dilution), 5  $\mu$ L of Platinum  
557 SYBR Green qPCR SuperMix-UDG (Life Technologies) and 3.75  $\mu$ L of primer pair mix  
558 at 0.8  $\mu$ M on a CFX384 from Biorad. We used the following thermal profile: 10 min at  
559 95 °C, and 40 cycles of 30 s at 95 °C, 30 s at 55 °C and 45 s at 72 °C. We carried out  
560 melting curve analyses after the amplification process to ensure the specificity of the  
561 amplified products. We also simultaneously performed qPCR reactions with no  
562 template controls for each gene to test the absence of non-specific products. Cq  
563 values were determined with the CFX Manager 3.1 (Bio-Rad) software and expression  
564 levels were normalized on the expression levels of the house-keeping genes TATA-  
565 box binding protein (*TBP*), hypoxanthine-guanine phosphoribosyltransferase (*HPRT*),  
566 and glyceraldehyde 3-phosphate dehydrogenase (*GAPDH*) using the  $\Delta\Delta$ Ct method.  
567 The primer sequences are in **Supplementary Table 8**.

568

### 569 **PCR for determination of CRISPR-Cas9-induced indels**

570 We isolated gDNA using QuickExtract DNA Extraction Solution (Epicentre, QE0905)  
571 from  $1 \times 10^5$  cells. We used 100 or 200 ng of gDNA as a template for PCR reaction with  
572 the corresponding primers (see **Supplementary Table 9**). gDNA from parental  
573 teloHAEC cells was used as control. Obtained PCR products were analysed by  
574 electrophoresis on a 1% agarose gel prior to Sanger sequencing. We used TIDE  
575 (tracking of indels deconvolution) software for analysis<sup>54</sup>.

576

### 577 **Assays for assessment of cell senescence**

578 Using the same experimental design (DHX38-Crimson), we performed beta-  
579 galactosidase staining using the CellEvent Senescence Green Flow Cytometry Assay  
580 Kit from Invitrogen at day 2, day 4 and day 7 following the manufacturer's protocol.  
581 Briefly, we trypsinized and we fixed the cells with 2% paraformaldehyde solution during  
582 10 minutes at room temperature, washed them in 1%BSA/PBS and incubated for 1h30  
583 in 1/500 working solution. After incubation, we washed the cells with 1%BSA/PBS and  
584 analyzed them by flow cytometry. We measured  $\beta$ -galactosidase fluorescence signal  
585 in positive and negative Crimson cells independently. As positive control, non-infected  
586 cells were treated with 20  $\mu$ M of Etoposide (Sigma, E1383-25) for 2, 4 and 7 days.

587

### 588 **Transcriptome data analysis**

589 For RNA-seq analysis, we extracted RNA using RNeasy plus mini kit from Qiagen (cat  
590 #: 74136). RNA-seq experiments were carried out by the Centre d'Expertise et de  
591 Services Genome Quebec using rRNA-depleted TruSeq stranded (HMR) libraries  
592 (Illumina) on an Illumina Hiseq 4000 instrument (paired-ends, 100-bp reads) and by

593 The Center for applied Genomics (Toronto) using rRNA-deletion library prep on an  
594 Illumina NovaSeq-SP flow cell. We quality-controlled raw fastq files with FastQC and  
595 multiQC<sup>47</sup>. We used kallisto (v. 0.46.0) to quantify transcript abundances<sup>55</sup> against  
596 ENSEMBL reference transcripts (release 94) followed by tximport to calculate gene-  
597 level counts<sup>56</sup>. We utilized regularized log-transformation (rlog) in DESeq2<sup>50</sup> as input  
598 for principal component analysis (PCA). DESeq2<sup>50</sup> was further used to identify  
599 differentially-expressed genes between teloHAEC cell models (Cas9, dCas9-VP64)  
600 infected by lentiviruses with safe-harbor sgRNA or sgRNA identified in the pooled  
601 CRISPR screens. We excluded genes expressed with less than 10 reads across all  
602 samples from the analysis. We performed shrinkage for effect size estimates using  
603 apeglm using the lfcShrink method<sup>57</sup>. Genes differentially expressed with a Benjamini-  
604 Hochberg adjusted p-value  $\leq 0.05$  were considered significant. Gene set enrichment  
605 analysis was performed using the R package fgsea using 100,000 permutations  
606 against the Hallmark gene sets from msigdb (<https://igordot.github.io/msigdb/>)<sup>58,59</sup>.  
607 We quantified short indels in the RNA-seq data of *DHX38* (sgRNA\_10966) and *MAT2A*  
608 (sgRNA\_02249) using the tools transIndel and Genesis-Indel, which are specifically  
609 designed to identify indels in the unmapped read fraction of samples<sup>60,61</sup>.

610

### 611 **Analysis of scRNA-seq data from human coronary arteries**

612 Single-cell gene expression matrix from human right atherosclerotic coronary arteries  
613 (three male and one female donors), was downloaded from NCBI GEO (GSE131780,  
614 <https://www.ncbi.nlm.nih.gov/geo/query/acc.cgi?acc=GSE131780>). The data was re-  
615 analyzed using the Seurat package in R with a standard single-cell clustering pipeline.  
616 Gene expression data was normalized using the SCTransform function from Seurat  
617 (v.3.2.3), regressing out the percentage of mitochondrial gene expression. Principal

618 components analysis was performed, followed by dimensional reduction with Uniform  
619 Manifold Approximation and Projection (UMAP) using the first 20 principal components  
620 as input. Gene expression was visualized on the first two UMAP dimensions using the  
621 kernel density function (`plot_density`) from the `Nebulosa` package (v.0.99.92)<sup>62</sup> for  
622 endothelial cell marker and candidate genes.

623

### 624 **Statistics and data analysis**

625 Unless noted otherwise, we performed all data and statistical analyses in R (v.3.6.0)  
626 using Rstudio. We ran our analyses on a high performance computing cluster (Beluga)  
627 from Calcul Quebec/Compute Canada. For MAGECK variant-level analyses,  
628 permutation-based FDR of  $\leq 10\%$  were considered significant. For RNA-seq analysis,  
629 genes with a Benjamini-Hochberg adjusted P-value in DESeq2  $\leq 0.05$  were considered  
630 significant<sup>50</sup>.

631

632 **Funding statements**

633 Florian Wünnemann is supported by a postdoctoral fellowship from the Fonds de  
634 Recherche Santé - Québec (FRQS). This work was funded by the Canadian Institutes  
635 of Health Research (MOP #136979), the Heart and Stroke Foundation of Canada  
636 (Grant #G-18-0021604), the Canada Research Chair Program, the Fondation Joseph  
637 C. Edwards and the Montreal Heart Institute Foundation.

638

639 **Conflict of Interest**

640 The authors declare no conflict of interests.

641

642 **Acknowledgements**

643 This research was enabled in part by support provided by Calcul Quebec  
644 (<https://www.calculquebec.ca/en/>) and Compute Canada ([www.computecanada.ca](http://www.computecanada.ca)).  
645 We thank John D. Rioux and Catherine Martel for flow cytometry and FACS analysis.  
646 We thank Éric Thorin, Mike Sapieha, Dan Bauer and Luca Pinello for providing  
647 comments on an earlier version of this manuscript. Finally, we thank Génome Québec  
648 and the Center for Applied Genomics (TCAG) in Toronto for performing next-  
649 generation DNA sequencing for this project.

650

651 **Data availability**

652 The data discussed in this publication have been deposited in NCBI's Gene  
653 Expression Omnibus<sup>63</sup> and are accessible through GEO Series accession number  
654 GSE165925 (<https://www.ncbi.nlm.nih.gov/geo/query/acc.cgi?acc=GSE165925>).

655

656 **REFERENCES**

- 657 1. Hopkins, P. N. Molecular biology of atherosclerosis. *Physiol. Rev.* **93**, 1317–1542  
658 (2013).
- 659 2. Libby, P., Ridker, P. M. & Hansson, G. K. Progress and challenges in translating  
660 the biology of atherosclerosis. *Nature* **473**, 317–325 (2011).
- 661 3. van der Harst, P. & Verweij, N. Identification of 64 Novel Genetic Loci Provides  
662 an Expanded View on the Genetic Architecture of Coronary Artery Disease. *Circ.*  
663 *Res.* **122**, 433–443 (2018).
- 664 4. Musunuru, K. & Kathiresan, S. Genetics of Common, Complex Coronary Artery  
665 Disease. *Cell* **177**, 132–145 (2019).
- 666 5. Klarin, D. *et al.* Genetic analysis in UK Biobank links insulin resistance and  
667 transendothelial migration pathways to coronary artery disease. *Nat. Genet.* **49**,  
668 1392–1397 (2017).
- 669 6. Howson, J. M. M. *et al.* Fifteen new risk loci for coronary artery disease highlight  
670 arterial-wall-specific mechanisms. *Nat. Genet.* **49**, 1113–1119 (2017).
- 671 7. Codina-Fauteux, V.-A., Beaudoin, M., Lalonde, S., Lo, K. S. & Lettre, G.  
672 PHACTR1 splicing isoforms and eQTLs in atherosclerosis-relevant human cells.  
673 *BMC Med. Genet.* **19**, 97 (2018).
- 674 8. Wang Xiao & Musunuru Kiran. Confirmation of Causal rs9349379-PHACTR1  
675 Expression Quantitative Trait Locus in Human-Induced Pluripotent Stem Cell  
676 Endothelial Cells. *Circulation: Genomic and Precision Medicine* **11**, e002327  
677 (2018).
- 678 9. Lalonde, S. *et al.* Integrative analysis of vascular endothelial cell genomic features  
679 identifies AIDA as a coronary artery disease candidate gene. *Genome Biol.* **20**,  
680 133 (2019).

- 681 10. Krause, M. D. *et al.* Genetic variant at coronary artery disease and ischemic  
682 stroke locus 1p32.2 regulates endothelial responses to hemodynamics. *Proc.*  
683 *Natl. Acad. Sci. U. S. A.* **115**, E11349–E11358 (2018).
- 684 11. Cahill, P. A. & Redmond, E. M. Vascular endothelium - Gatekeeper of vessel  
685 health. *Atherosclerosis* **248**, 97–109 (2016).
- 686 12. Godo, S. & Shimokawa, H. Endothelial Functions. *Arterioscler. Thromb. Vasc.*  
687 *Biol.* **37**, e108–e114 (2017).
- 688 13. Sandoval, R. *et al.* Ca(2+) signalling and PKC $\alpha$  activate increased endothelial  
689 permeability by disassembly of VE-cadherin junctions. *J. Physiol.* **533**, 433–445  
690 (2001).
- 691 14. Wright, A. V., Nuñez, J. K. & Doudna, J. A. Biology and Applications of CRISPR  
692 Systems: Harnessing Nature’s Toolbox for Genome Engineering. *Cell* **164**, 29–  
693 44 (2016).
- 694 15. Doench, J. G. *et al.* Rational design of highly active sgRNAs for CRISPR-Cas9-  
695 mediated gene inactivation. *Nat. Biotechnol.* **32**, 1262–1267 (2014).
- 696 16. Joung, J. *et al.* Genome-scale CRISPR-Cas9 knockout and transcriptional  
697 activation screening. *Nat. Protoc.* **12**, 828–863 (2017).
- 698 17. Fulco, C. P. *et al.* Systematic mapping of functional enhancer-promoter  
699 connections with CRISPR interference. *Science* **354**, 769–773 (2016).
- 700 18. Nikpay, M. *et al.* A comprehensive 1,000 Genomes-based genome-wide  
701 association meta-analysis of coronary artery disease. *Nat. Genet.* **47**, 1121–1130  
702 (2015).
- 703 19. Nelson, C. P. *et al.* Association analyses based on false discovery rate implicate  
704 new loci for coronary artery disease. *Nat. Genet.* **49**, 1385–1391 (2017).
- 705 20. Maurano, M. T. *et al.* Systematic localization of common disease-associated

- 706 variation in regulatory DNA. *Science* **337**, 1190–1195 (2012).
- 707 21. Vierstra, J. *et al.* Global reference mapping of human transcription factor  
708 footprints. *Nature* **583**, 729–736 (2020).
- 709 22. Ioka, T. *et al.* Association between plasma lipoprotein(a) and endothelial  
710 dysfunction in normocholesterolemic and non-diabetic patients with  
711 angiographically normal coronary arteries. *Circ. J.* **66**, 267–271 (2002).
- 712 23. Stolze, L. K. *et al.* Systems Genetics in Human Endothelial Cells Identifies Non-  
713 coding Variants Modifying Enhancers, Expression, and Complex Disease Traits.  
714 *Am. J. Hum. Genet.* (2020) doi:10.1016/j.ajhg.2020.04.008.
- 715 24. Yang, X. *et al.* FURIN Expression in Vascular Endothelial Cells Is Modulated by  
716 a Coronary Artery Disease–Associated Genetic Variant and Influences Monocyte  
717 Transendothelial Migration. *Journal of the American Heart Association* vol. 9  
718 (2020).
- 719 25. Acosta, J. C. *et al.* A complex secretory program orchestrated by the  
720 inflammasome controls paracrine senescence. *Nat. Cell Biol.* **15**, 978–990  
721 (2013).
- 722 26. Gorgoulis, V. *et al.* Cellular Senescence: Defining a Path Forward. *Cell* **179**, 813–  
723 827 (2019).
- 724 27. Binet, F. *et al.* Neutrophil extracellular traps target senescent vasculature for  
725 tissue remodeling in retinopathy. *Science* **369**, (2020).
- 726 28. Tchantchou, F., Graves, M., Falcone, D. & Shea, T. B. S-adenosylmethionine  
727 mediates glutathione efficacy by increasing glutathione S-transferase activity:  
728 implications for S-adenosyl methionine as a neuroprotective dietary supplement.  
729 *J. Alzheimers. Dis.* **14**, 323–328 (2008).
- 730 29. Soubeyrand, S., Lau, P., Peters, V. & McPherson, R. Off-target effects of



- 731 CRISPRa on interleukin-6 expression. *PLoS One* **14**, e0224113 (2019).
- 732 30. Limbad, C. *et al.* Astrocyte senescence promotes glutamate toxicity in cortical  
733 neurons. *PLoS One* **15**, e0227887 (2020).
- 734 31. Pu, X. *et al.* Effect of a coronary-heart-disease-associated variant of ADAMTS7  
735 on endothelial cell angiogenesis. *Atherosclerosis* **296**, 11–17 (2020).
- 736 32. Gimbrone, M. A., Jr & García-Cardeña, G. Endothelial Cell Dysfunction and the  
737 Pathobiology of Atherosclerosis. *Circ. Res.* **118**, 620–636 (2016).
- 738 33. Khan, S. Y. *et al.* Premature senescence of endothelial cells upon chronic  
739 exposure to TNF $\alpha$  can be prevented by N-acetyl cysteine and plumericin. *Sci.*  
740 *Rep.* **7**, 39501 (2017).
- 741 34. Kim, W. *et al.* Loss of endothelial furin leads to cardiac malformation and early  
742 postnatal death. *Mol. Cell. Biol.* **32**, 3382–3391 (2012).
- 743 35. Lotta, L. A. *et al.* Integrative genomic analysis implicates limited peripheral  
744 adipose storage capacity in the pathogenesis of human insulin resistance. *Nat.*  
745 *Genet.* **49**, 17–26 (2017).
- 746 36. Kuroda, M. *et al.* Identification of interferon-stimulated genes that attenuate Ebola  
747 virus infection. *Nat. Commun.* **11**, 2953 (2020).
- 748 37. Baz-Martínez, M. *et al.* Cell senescence is an antiviral defense mechanism. *Sci.*  
749 *Rep.* **6**, 37007 (2016).
- 750 38. Goligorsky, M. S., Chen, J. & Patschan, S. Stress-induced premature senescence  
751 of endothelial cells: a perilous state between recovery and point of no return. *Curr.*  
752 *Opin. Hematol.* **16**, 215–219 (2009).
- 753 39. Vasile, E., Tomita, Y., Brown, L. F., Kocher, O. & Dvorak, H. F. Differential  
754 expression of thymosin beta-10 by early passage and senescent vascular  
755 endothelium is modulated by VPF/VEGF: evidence for senescent endothelial cells

- 756 in vivo at sites of atherosclerosis. *FASEB J.* **15**, 458–466 (2001).
- 757 40. Minamino Tohru *et al.* Endothelial Cell Senescence in Human Atherosclerosis.  
758 *Circulation* **105**, 1541–1544 (2002).
- 759 41. Childs, B. G. *et al.* Senescent intimal foam cells are deleterious at all stages of  
760 atherosclerosis. *Science* **354**, 472–477 (2016).
- 761 42. Regnault, V., Challande, P., Pinet, F., Li, Z. & Lacolley, P. Cell senescence: basic  
762 mechanisms and the need for computational networks in vascular ageing.  
763 *Cardiovasc. Res.* (2020) doi:10.1093/cvr/cvaa318.
- 764 43. Lessard, S. *et al.* Human genetic variation alters CRISPR-Cas9 on- and off-  
765 targeting specificity at therapeutically implicated loci. *Proc. Natl. Acad. Sci. U. S.*  
766 *A.* **114**, E11257–E11266 (2017).
- 767 44. Hart, T., Brown, K. R., Sircoulomb, F., Rottapel, R. & Moffat, J. Measuring error  
768 rates in genomic perturbation screens: gold standards for human functional  
769 genomics. *Mol. Syst. Biol.* **10**, 733 (2014).
- 770 45. Sanjana, N. E., Shalem, O. & Zhang, F. Improved vectors and genome-wide  
771 libraries for CRISPR screening. *Nat. Methods* **11**, 783–784 (2014).
- 772 46. Lalonde, S. *et al.* Frameshift indels introduced by genome editing can lead to in-  
773 frame exon skipping. *PLoS One* **12**, e0178700 (2017).
- 774 47. Ewels, P., Magnusson, M., Lundin, S. & Käller, M. MultiQC: summarize analysis  
775 results for multiple tools and samples in a single report. *Bioinformatics* **32**, 3047–  
776 3048 (2016).
- 777 48. Li, W. *et al.* MAGeCK enables robust identification of essential genes from  
778 genome-scale CRISPR/Cas9 knockout screens. *Genome Biol.* **15**, 554 (2014).
- 779 49. Li, W. *et al.* Quality control, modeling, and visualization of CRISPR screens with  
780 MAGeCK-VISPR. *Genome Biol.* **16**, 281 (2015).

- 781 50. Love, M. I., Huber, W. & Anders, S. Moderated estimation of fold change and  
782 dispersion for RNA-seq data with DESeq2. *Genome Biol.* **15**, 550 (2014).
- 783 51. McInnes, L., Healy, J. & Melville, J. UMAP: Uniform Manifold Approximation and  
784 Projection for Dimension Reduction. *arXiv [stat.ML]* (2018).
- 785 52. Shalem, O. *et al.* Genome-scale CRISPR-Cas9 knockout screening in human  
786 cells. *Science* **343**, 84–87 (2014).
- 787 53. Bustin, S. A. *et al.* The MIQE guidelines: minimum information for publication of  
788 quantitative real-time PCR experiments. *Clin. Chem.* **55**, 611–622 (2009).
- 789 54. Brinkman, E. K., Chen, T., Amendola, M. & van Steensel, B. Easy quantitative  
790 assessment of genome editing by sequence trace decomposition. *Nucleic Acids*  
791 *Res.* **42**, e168 (2014).
- 792 55. Bray, N. L., Pimentel, H., Melsted, P. & Pachter, L. Near-optimal probabilistic  
793 RNA-seq quantification. *Nat. Biotechnol.* **34**, 525–527 (2016).
- 794 56. Sonesson, C., Love, M. I. & Robinson, M. D. Differential analyses for RNA-seq:  
795 transcript-level estimates improve gene-level inferences. *F1000Res.* **4**, 1521  
796 (2015).
- 797 57. Zhu, A., Ibrahim, J. G. & Love, M. I. Heavy-tailed prior distributions for sequence  
798 count data: removing the noise and preserving large differences. *Bioinformatics*  
799 **35**, 2084–2092 (2019).
- 800 58. Liberzon, A. *et al.* The Molecular Signatures Database (MSigDB) hallmark gene  
801 set collection. *Cell Syst* **1**, 417–425 (2015).
- 802 59. Yu, G., Wang, L.-G., Han, Y. & He, Q.-Y. clusterProfiler: an R package for  
803 comparing biological themes among gene clusters. *OMICS* **16**, 284–287 (2012).
- 804 60. Yang, R., Van Etten, J. L. & Dehm, S. M. Indel detection from DNA and RNA  
805 sequencing data with transIndel. *BMC Genomics* **19**, 270 (2018).

- 806 61. Hasan, M. S., Wu, X. & Zhang, L. Uncovering missed indels by leveraging  
807 unmapped reads. *Sci. Rep.* **9**, 11093 (2019).
- 808 62. Alquicira-Hernandez, J. & Powell, J. E. Nebulosa recovers single cell gene  
809 expression signals by kernel density estimation. *Bioinformatics* (2021).
- 810 63. Edgar, R., Domrachev, M. & Lash, A. E. Gene Expression Omnibus: NCBI gene  
811 expression and hybridization array data repository. *Nucleic Acids Res.* **30**, 207–  
812 210 (2002).
- 813 64. Fulco, C. P. et al. Activity-by-contact model of enhancer-promoter regulation from  
814 thousands of CRISPR perturbations. *Nat. Genet.* **51**, 1664–1669 (2019).
- 815 65. Wirka, R. C. et al. Atheroprotective roles of smooth muscle cell phenotypic  
816 modulation and the TCF21 disease gene as revealed by single-cell analysis. *Nat.*  
817 *Med.* **25**, 1280–1289 (2019).

818 **FIGURES**

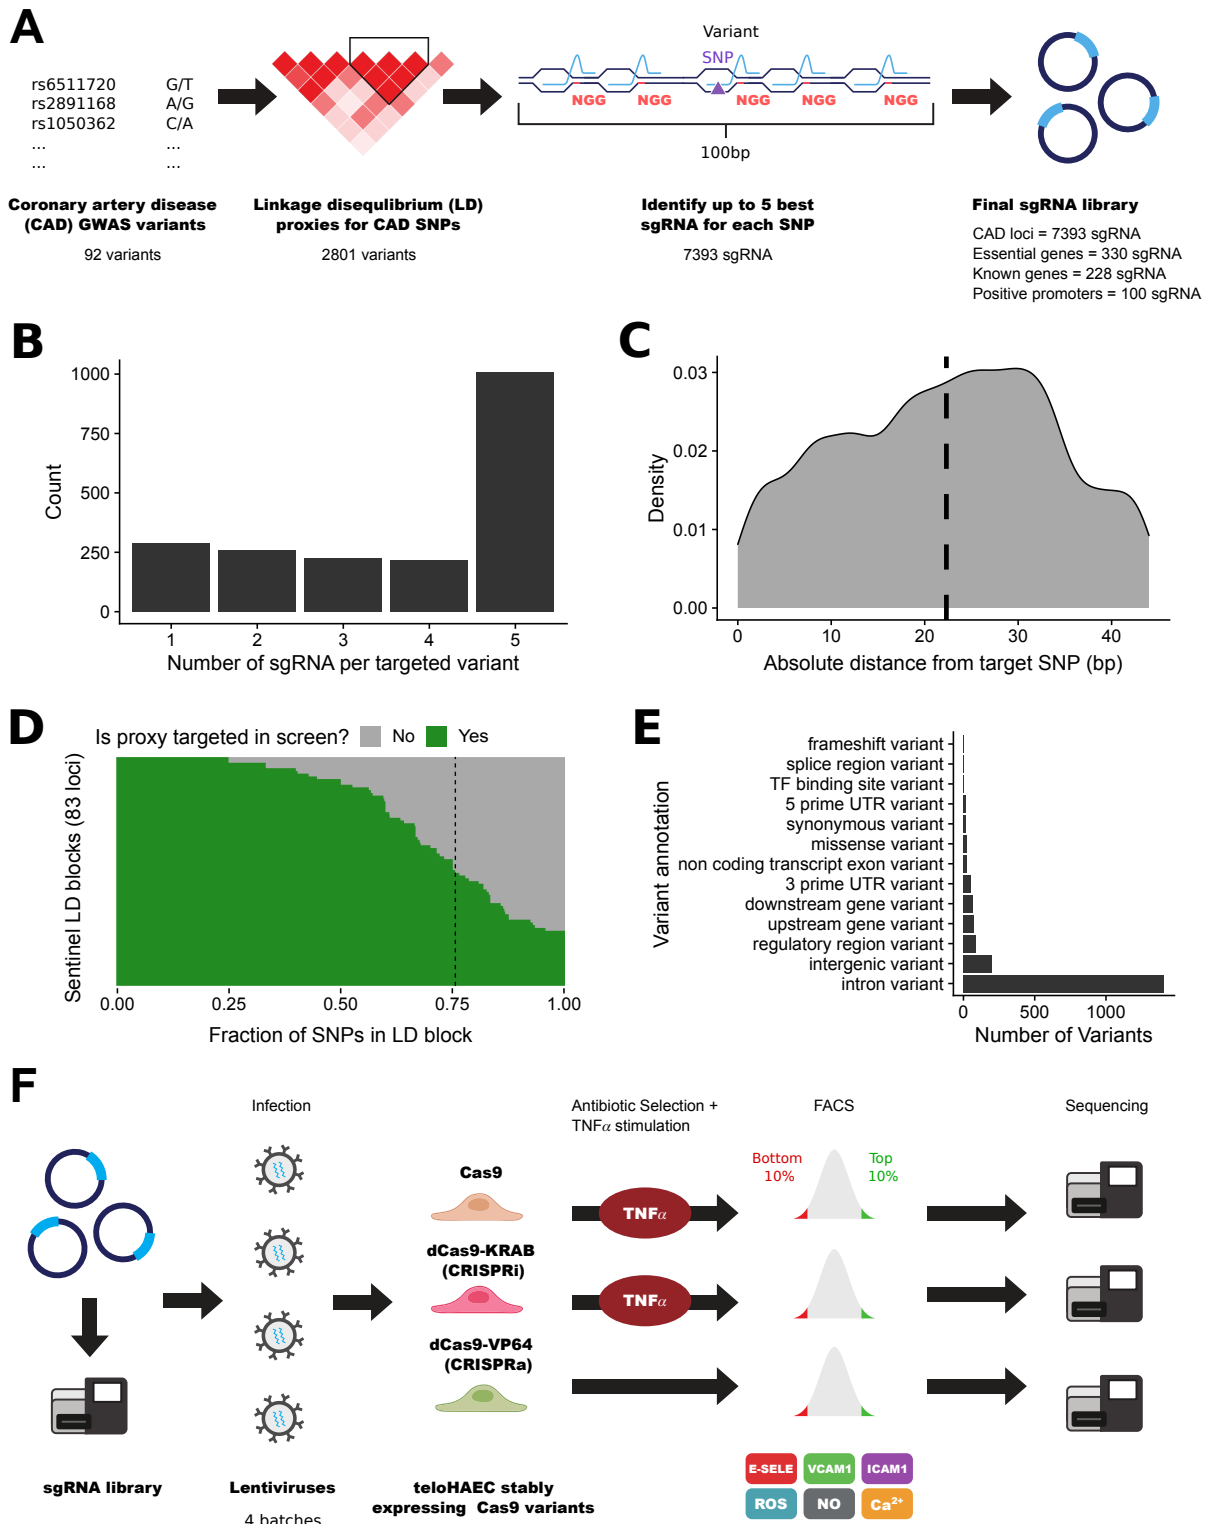

819

820 **Figure 1.** Pooled CRISPR screens to identify CAD variants and genes that modulate  
821 vascular endothelial functions.

822 **(A)** From 92 loci associated with coronary artery disease (CAD) risk by genome-wide  
823 association studies (GWAS), we identified 2893 sentinel and linkage disequilibrium  
824 proxy variants for testing. For each of these variants, we attempted to design a  
825 maximum of five high-quality guide RNAs (sgRNAs) within a 100-bp window. In the  
826 design of the library, we also included sgRNAs that target genes essential for cell  
827 viability, as well as sgRNAs that target the coding sequence and promoter of genes  
828 that control endothelial cell functions (known genes, positive controls). **(B)** Number of  
829 sgRNAs per targeted variant that passed stringent quality-control filters. In total, we  
830 designed 7393 sgRNAs against 1998 CAD-associated variants (mean and median  
831 number of sgRNA per variant are 3.7 and 5, respectively). **(C)** Distribution of the  
832 absolute distance of the sgRNA cut-site relative to the targeted variant in base pairs  
833 (the vertical dashed line indicates mean sgRNA distance). **(D)** Fraction of variants at  
834 each locus that are successfully targeted by our pooled CRISPR screens. Each row  
835 represents one of the CAD loci that we tested. In green is the fraction of variants -  
836 including sentinel and LD proxies - for which we designed high-quality sgRNAs and  
837 obtained results for the endothelial function phenotypes. On average, 76% of variants  
838 at any given CAD locus are captured in the screens (vertical dashed line). **(E)** Most  
839 severe annotation for the 1998 CAD variants targeted by the lentiviral sgRNA libraries  
840 using ENSEMBL's Variant Effect Predictor (VEP) module. **(F)** As a control step, we  
841 sequenced the plasmid library to ensure even representation of sgRNAs in the pool.  
842 Then, we produced four independent batches of lentiviruses which we used to infect  
843 teloHAEC cells that stably express Cas9, dCas9-KRAB (CRISPRi) or dCas9-VP64  
844 (CRISPRa). Following antibiotic selection and TNF $\alpha$  treatment (for Cas9 and  
845 CRISPRi), we stained teloHAEC for cell surface markers (E-selectin, ICAM-1, VCAM-  
846 1) or intracellular signaling molecules (reactive oxygen species (ROS), nitric oxide

847 (NO), calcium ( $\text{Ca}^{2+}$ ). By flow cytometry, we sorted cells from the bottom and top 10  
848 percentiles of the marker distributions, and sequenced sgRNAs found in each fraction.  
849  
850

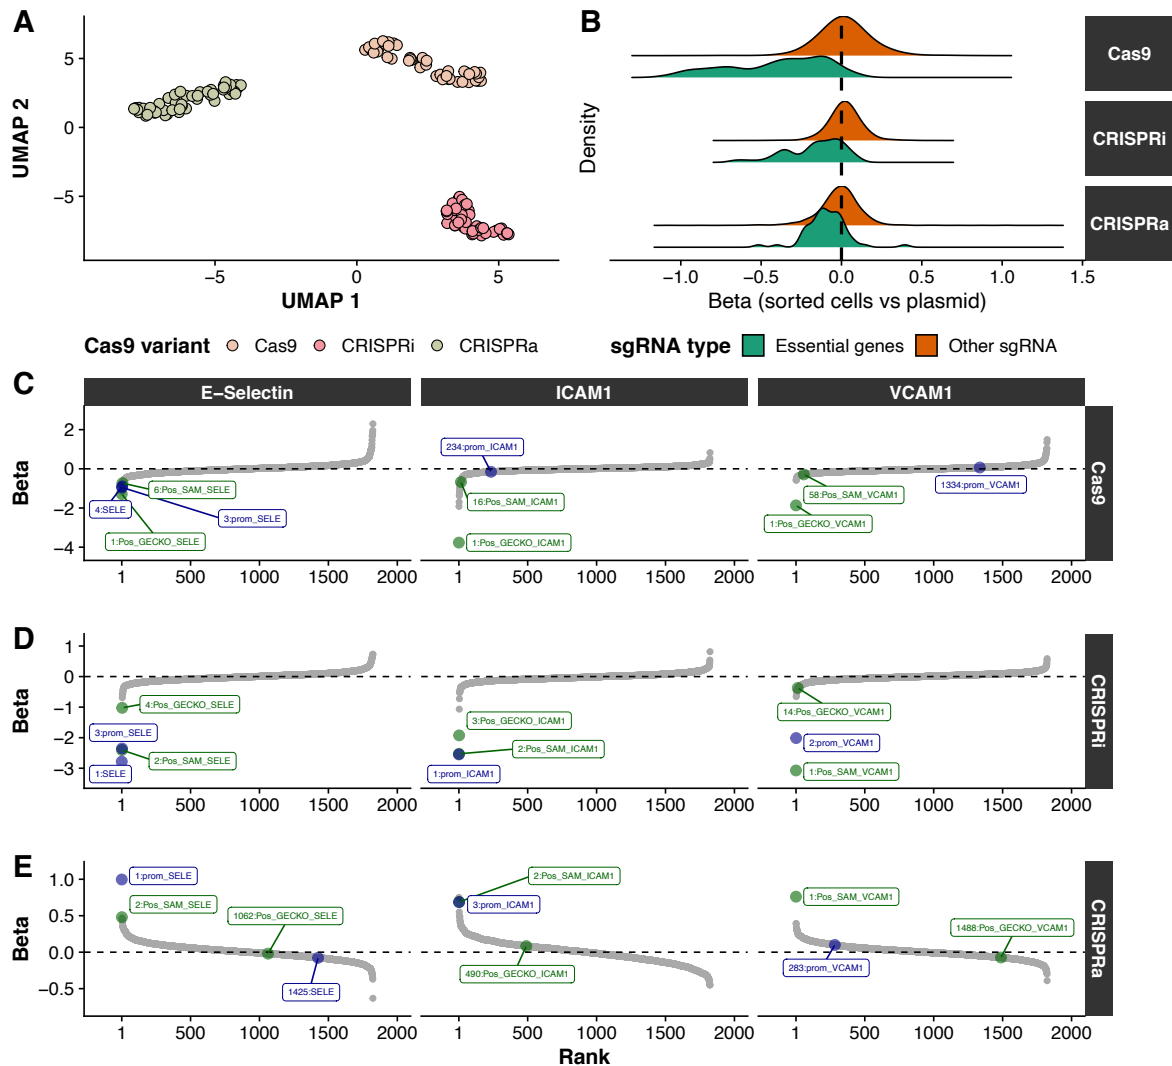

851

852 **Figure 2.** Quality-controls of the pooled CRISPR screens for vascular endothelial cell  
 853 phenotypes.

854 **(A)** Two-dimensional uniform manifold approximation and projection (UMAP)  
 855 representation of 148 fluorescence-activated cell sorting (FACS) samples based on  
 856 the normalized read counts of the top 10% most variable sgRNAs across all samples.

857 **(B)** Density distributions of effect sizes (Beta, x-axis) across all Cas9 variants for  
 858 essential genes and the rest of the sgRNA library. Positive betas indicate that sgRNA  
 859 are enriched in the cell fractions when compared to the input library, while negative  
 860 betas indicate a depletion of sgRNA across all samples. We observed a depletion of

861 sgRNA targeting essential genes with all three Cas9 variants. **(C-E)** Rank of all control



862 sgRNAs and targeted CAD variants in the **(C)** Cas9, **(D)** CRISPRi and **(E)** CRISPRa  
863 screens for three adhesion proteins: E-selectin (left), VCAM1 (middle) and ICAM1  
864 (right). For each panel, the y-axis corresponds to the effect sizes (Beta, comparing top  
865 vs bottom FACS 10% fractions). For the Cas9 and CRISPRi experiments, we found  
866 an enrichment of sgRNAs targeting the coding and promoter sequences of genes  
867 encoding adhesion proteins in the bottom 10% cell fractions (negative Betas). In  
868 contrast, sgRNAs targeting the promoter of these genes were enriched in the top 10%  
869 cell fractions in the CRISPRa experiments. In green and blue, we highlight sgRNAs  
870 targeting coding exons and promoters, respectively. The number in front of the name  
871 of each control sgRNA indicates its rank in the corresponding analysis.  
872

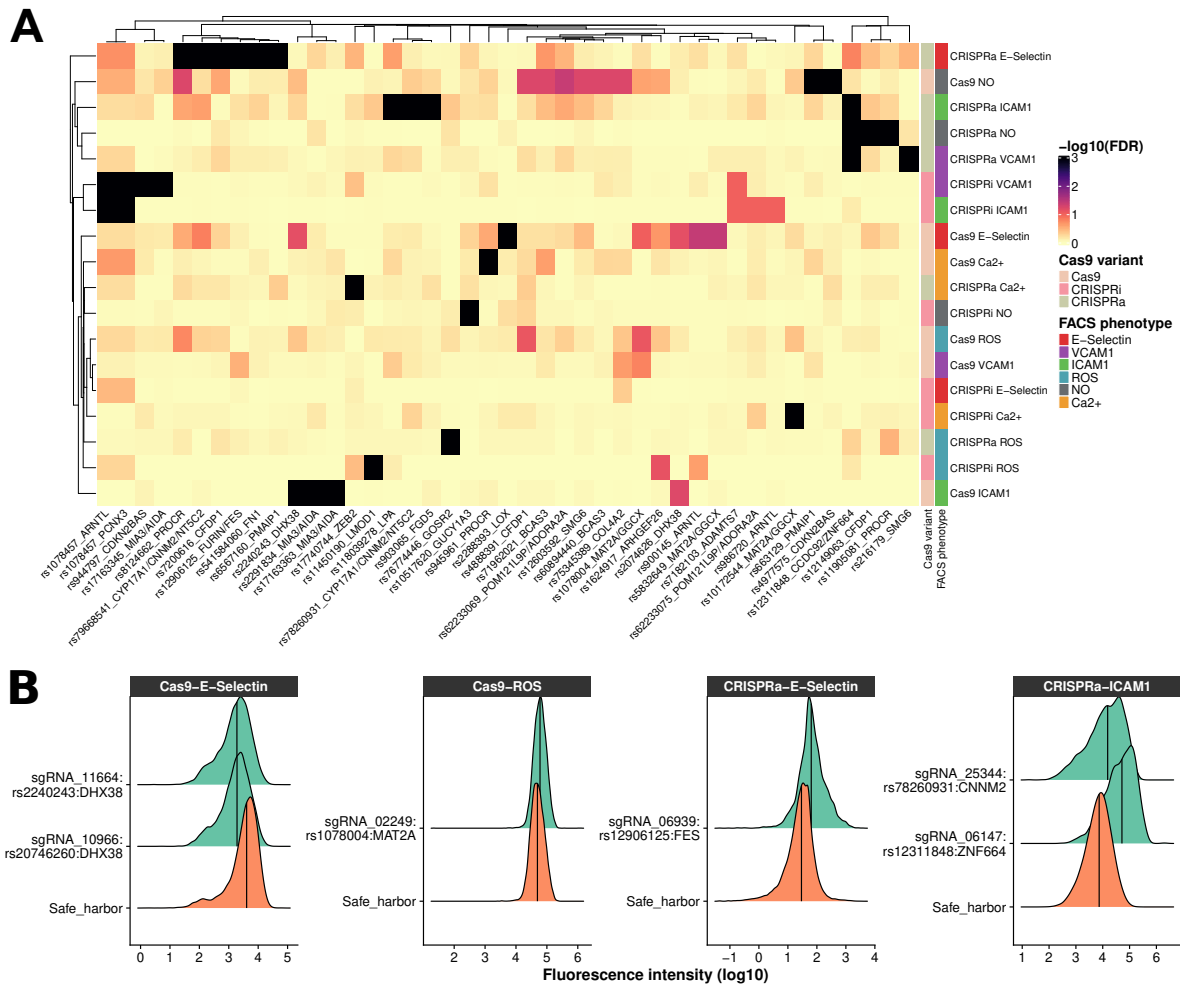

873

874 **Figure 3.** Discovery and validation of CRISPR perturbations that induce atheroprone

875 vascular endothelial cell phenotypes.

876 **(A)** Heatmap of CAD-associated variants that are significant (false discovery rate

877 (FDR)  $\leq 10\%$ ) for at least one of six endothelial phenotypes tested in the teloHAEC

878 pooled CRISPR screens. Each row corresponds to a combination of Cas9 variant and

879 cellular readout, and each column corresponds to a CAD variant. For each variant, we

880 added the name of a nearby gene to simplify locus identification, although we do not

881 imply that these genes are causal. Dendrograms of rows and columns represent

882 hierarchical clustering based on euclidean distance. The FDR is capped at 0.1%. **(B)**

883 Validation by flow cytometry of six hits from the pooled CRISPR screens. For each

884 validation, we used the top sgRNA from the pooled CRISPR screens to target the

885 variant/locus with the corresponding Cas9 variant. We compared the distribution of the  
886 fluorescence intensity of the cellular markers (x-axis) between the sgRNA identified in  
887 the screens and a safe harbor negative control sgRNA. We assessed statistical  
888 significance using the Kolmogorov-Smirnov (KS) test, all validations shown are  
889 significant (KS P-value  $<2.2 \times 10^{-16}$ ). Validations were performed in at least three  
890 independent experiments for each sgRNA (**Supplementary Table 5**).

891

892

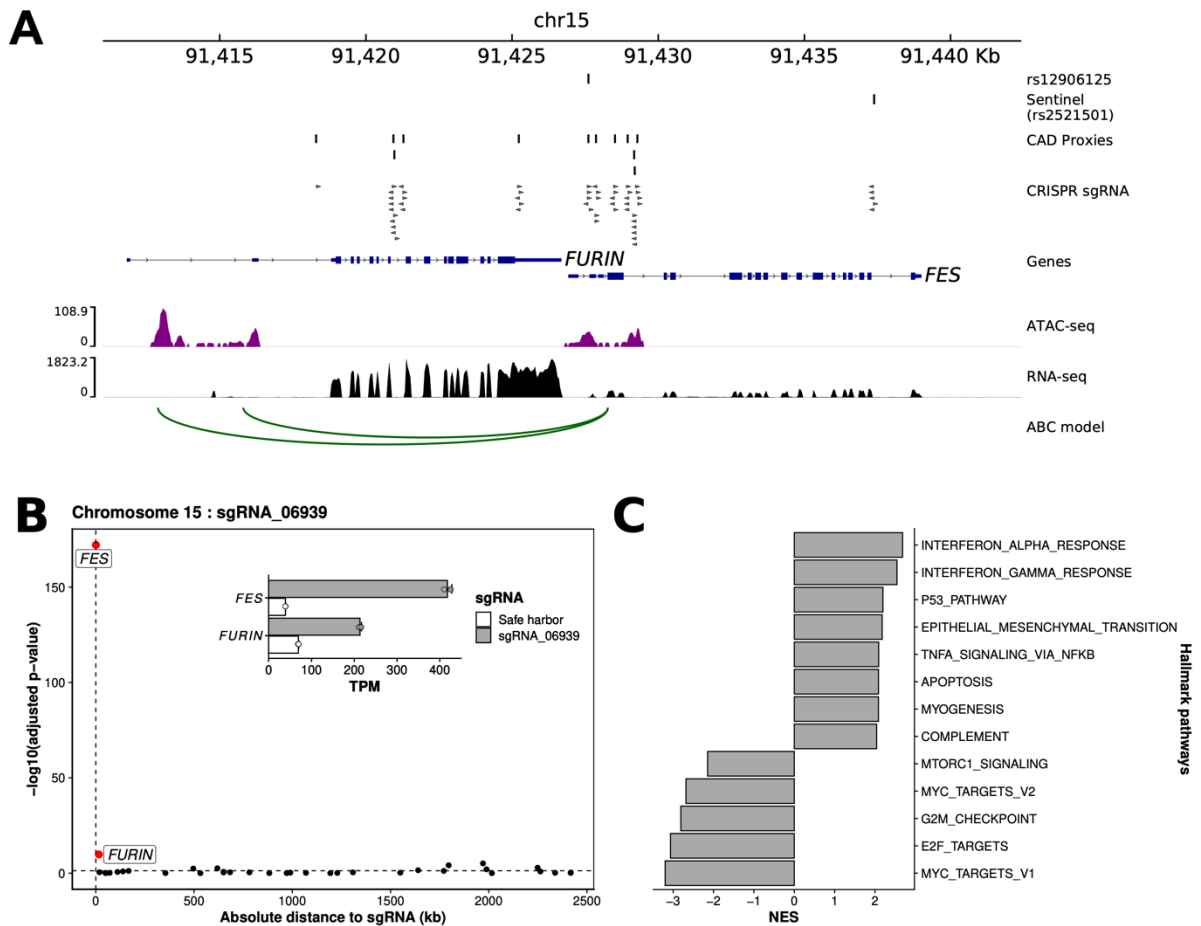

893

894 **Figure 4.** Characterization of a CAD-associated regulatory variant located within an  
895 enhancer at the *FURIN/FES* locus.

896 **(A)** CRISPRa perturbations highlighted rs12906125 as a potential regulatory variant  
897 for *FURIN* and *FES*. The variant overlaps an ATAC-seq peak in the promoter of *FES*  
898 and a H3K27ac-defined enhancer that physically interacts with the *FURIN* promoter  
899 through chromosomal loops predicted by the ABC model applied to teloHAEC Hi-C  
900 data<sup>9,64</sup>. **(B)** Within a 2.5-Mb window, *FES* and *FURIN* are the top two differentially  
901 expressed genes when targeting rs12906125 by CRISPRa in teloHAEC. The inset plot  
902 shows the induction of both *FES* and *FURIN* expression with sgRNA\_06939 when  
903 compared to the control safe harbor sgRNA. **(C)** Enrichment results of differentially  
904 expressed genes for the MSigDB (H) hallmark gene-sets, comparing RNA-seq data  
905 for CRISPRa experiments with sgRNA\_06939 targeting variant rs12906125 to a

906 control safe harbor sgRNA. Only pathways with a Benjamini-Hochberg-corrected P-  
907 value  $<0.05$  and a normalized enrichment score (NES)  $<-2$  or  $>2$  are highlighted. All  
908 results from the pathway analyses are presented in **Supplementary Table 6**.  
909

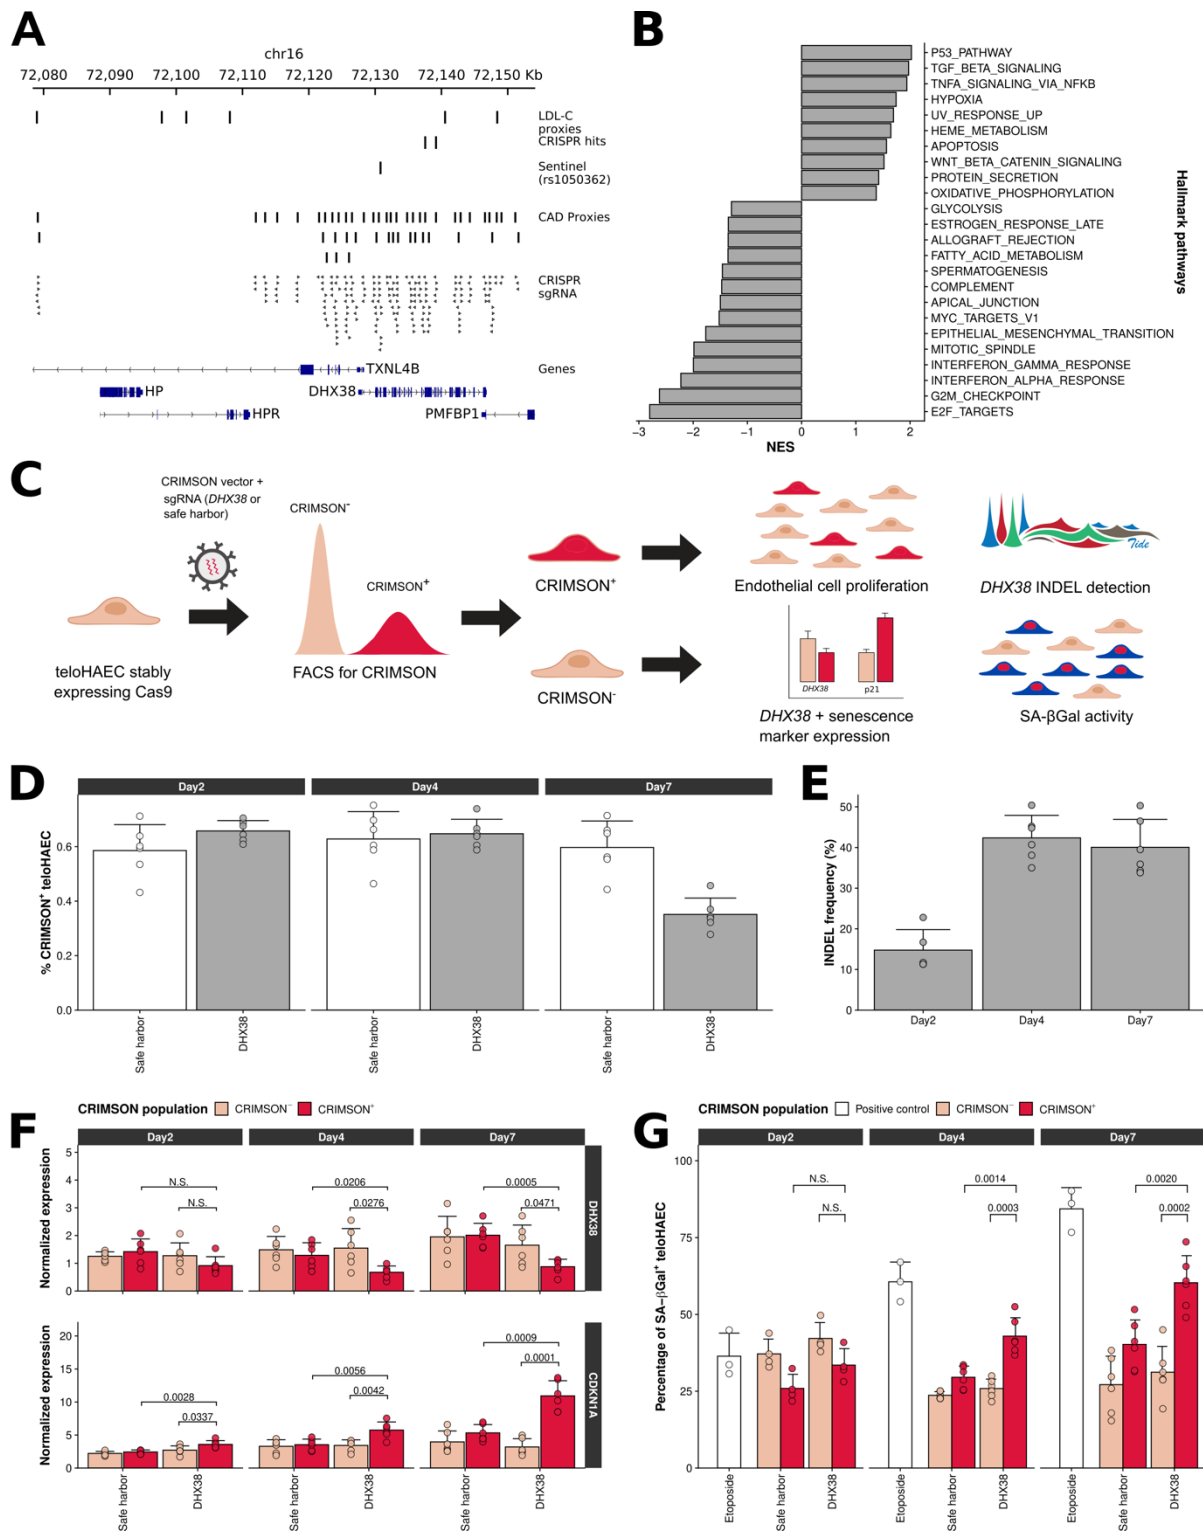

910

911 **Figure 5. Disruption of *DHX38* induces vascular endothelial cell senescence.**

912 (A) Perturbations with the Cas9 nuclease highlighted two synonymous variants

913 (rs2074626, rs2240243) in the *DHX38* gene for several endothelial phenotypes.

914 *DHX38* is located downstream of the *HP* and *HPR* genes, which have previously been

915 associated with LDL-C levels. However, the CAD and LDL-C GWAS signals are  
916 distinct. **(B)** Gene-set enrichment analysis results for differentially expressed genes  
917 identified by RNA-seq in teloHAEC between a sgRNA targeting a *DHX38* coding exon  
918 and a safe harbor negative control sgRNA. Only pathways with a Benjamini-Hochberg-  
919 corrected P-value <0.05 and normalized enrichment scores (NES) <-1 or >1 are  
920 shown. **(C)** Experimental design for the characterization of *DHX38* using the  
921 fluorescent marker CRIMSON in place of an antibiotic resistance gene. We did all  
922 experiments in teloHAEC that stably express Cas9. We monitored the impact of a  
923 *DHX38* sgRNA on cell proliferation, indel induction, gene expression and senescence-  
924 associated  $\beta$ -galactosidase (SA- $\beta$ Gal) activity. **(D)** Comparison of endothelial cell  
925 proliferation between teloHAEC with a *DHX38* sgRNA or a safe harbor negative  
926 control sgRNA. The differences in the number of CRIMSON<sup>+</sup> cells were not significant  
927 two or four days post-infection. However, there were 27% less CRIMSON<sup>+</sup> cells with  
928 *DHX38* sgRNA relative to the safe harbor control at seven days post-infection  
929 (Student's *t*-test *P*-value =  $7.3 \times 10^{-8}$ ). Results are mean  $\pm$  standard deviation for 6  
930 replicates for safe harbor and three replicates for two *DHX38* targeting sgRNA. **(E)**  
931 Quantification of *DHX38* indels by tracking of indel by decomposition (TIDE) analysis.  
932 As expected, we found no indels in the CRIMSON<sup>-</sup> cells (**Supplementary Table 7**).  
933 However, in CRIMSON<sup>+</sup> cells that received a *DHX38* sgRNA, we found indels with an  
934 average frequency of 15%, 42% and 40% at day 2, 4 and 7, respectively. Results are  
935 mean  $\pm$  standard deviation for 6 replicates for safe harbor and three replicates for two  
936 *DHX38* targeting sgRNA. **(F)** Expression levels of *DHX38* and *CDKN1A* in CRIMSON<sup>-</sup>  
937 and CRIMSON<sup>+</sup> teloHAEC that have received a sgRNA that targets *DHX38* or a safe  
938 harbor region (negative control). There were no significant differences in *DHX38*  
939 expression levels at day 2. However, at day 4 and 7, *DHX38* was significantly down-

940 regulated and *CDKN1A* was significantly up-regulated in CRIMSON<sup>+</sup> cells that  
941 received the *DHX38* sgRNA. N.S., not significant. We provide Student's *t*-test P-values  
942 when  $P < 0.05$ . Bars are mean normalized expression and error bars represent one  
943 standard deviation. **(G)** Quantification of senescent teloHAEC by flow cytometry using  
944 senescence-associated  $\beta$ -galactosidase (SA- $\beta$ Gal) staining. At day 4 and 7 post-  
945 infection, there were significantly more senescent cells in the CRIMSON<sup>+</sup> *DHX38*  
946 sgRNA experiment than in the CRIMSON<sup>-</sup> cells or in the CRIMSON<sup>+</sup> cells that received  
947 the safe harbor sgRNA. We used the DNA damaging agent etoposide as a positive  
948 control to induce senescence. N.S., not significant. We provide Student's *t*-test P-  
949 values when  $P < 0.05$ . Results are mean percentage SA- $\beta$ Gal<sup>+</sup> teloHAEC and error  
950 bars represent one standard deviation.  
951



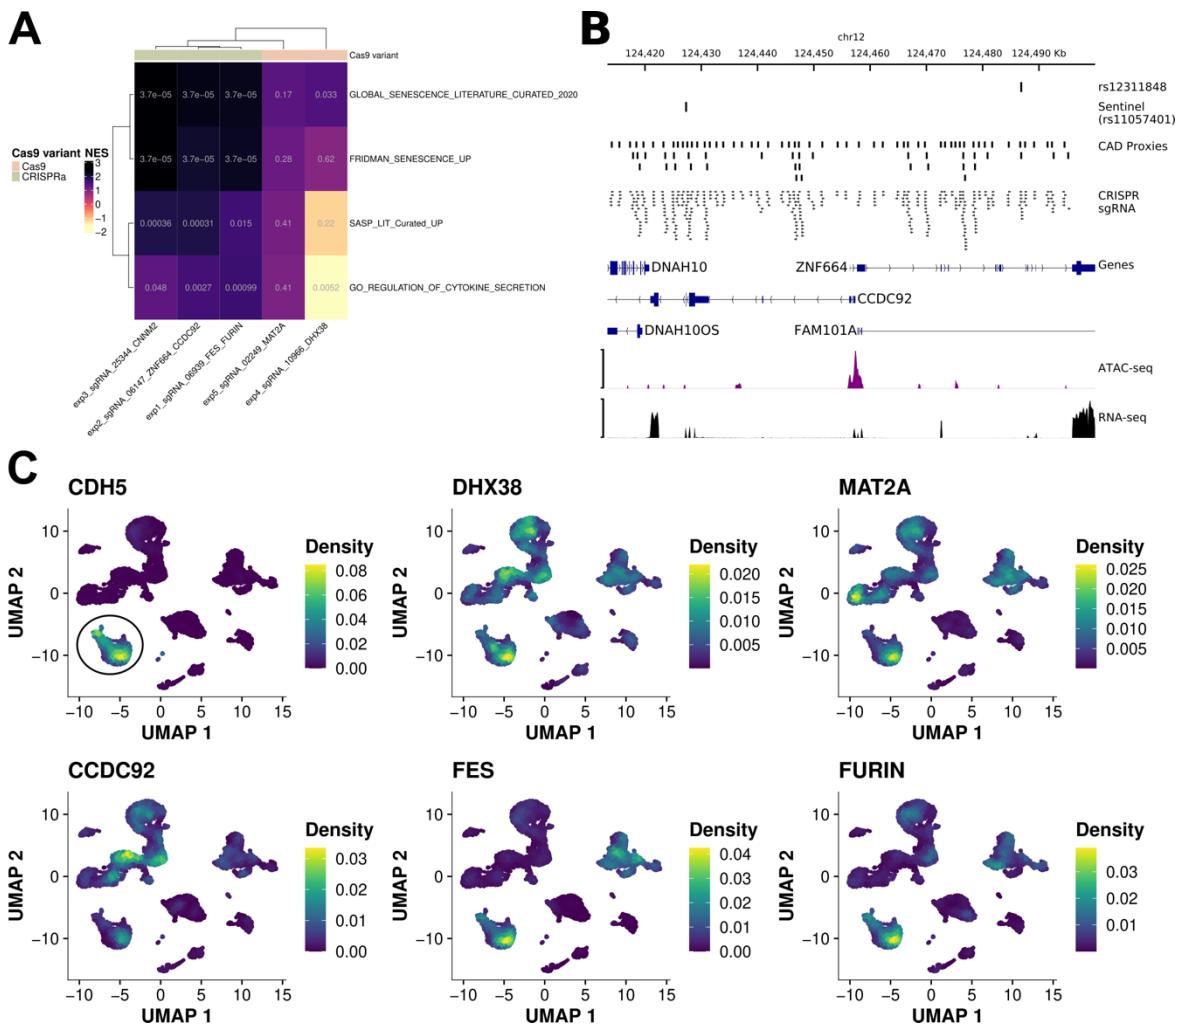

952

953 **Figure 6.** CRISPRa at the *FURIN/FES*, *CCDC92/ZNF664* and *CNNM2* loci activates

954 a gene expression signature of senescence. **(A)** Gene-set enrichment analyses of the

955 five RNA-seq experiments for four curated gene sets that capture senescence or the

956 SASP<sup>27</sup>. The three CRISPRa experiments are highly significant for the senescence

957 pathways. In each cell of the heatmap, the color and number indicate, respectively,

958 the normalized enrichment score (NES) and the Benjamini-Hochberg adjusted P-

959 value. **(B)** Locus view for the CAD locus with nearby genes *ZNF664* and *CCDC92*.

960 We provide the position of the sentinel CAD variant (rs11057401) and the functional

961 variant identified in the pooled CRISPR screen (rs12311848). The LD proxies and

962 sgRNAs tested are also shown. ATAC-seq and RNA-seq data in resting teloHAEC are

963 from ref.<sup>9</sup>. *DNAH10*, *DNAH10OS*, *FAM101A*, and *ZNF664* were not differentially

964 expressed in the CRISPRa experiment. (C) Uniform manifold approximation projection  
965 (UMAP) for 11,756 cells from human right coronary arteries analyzed by single-cell  
966 RNA-sequencing<sup>65</sup>. We color-coded cells based on the level of expression of  
967 candidate causal CAD genes identified and characterized in this study. We used the  
968 expression of the endothelial cell marker gene *CDH5* (encoding VE-Cadherin) to  
969 identify endothelial cells (circle in top left panel). All five candidate genes are  
970 expressed in human vascular endothelial cells from coronary arteries.

971
